# Supplementary material for: Fine-tuned local coordination environment of Pt single atoms on ceria controls catalytic reactivity
Source: Springer Nature journal article supplement (doi:10.1038/s41467-022-34797-2), 2022-11-18
Supplement: MOESM1 [file 41467_2022_34797_MOESM1_ESM.pdf]

## Supplementary Information

### **Fine-tuned local coordination environment of Pt single atoms on ceria controls catalytic reactivity**

Wei Tan<sup>1,2,†</sup>, Shaohua Xie<sup>1,†</sup>, Duy Le<sup>3,†</sup>, Weijian Diao<sup>4</sup>, Meiyu Wang<sup>5</sup>, Ke-Bin Low<sup>6</sup>, Dave Austin<sup>3</sup>,  
Sampyo Hong<sup>7</sup>, Fei Gao<sup>2</sup>, Lin Dong<sup>2</sup>, Lu Ma<sup>8</sup>, Steven N. Ehrlich<sup>8</sup>, Talat S. Rahman<sup>3</sup>, Fudong Liu<sup>1,\*</sup>

<sup>1</sup> *Department of Civil, Environmental, and Construction Engineering, Catalysis Cluster for Renewable Energy and Chemical Transformations (REACT), NanoScience Technology Center (NSTC), University of Central Florida, Orlando, FL 32816, United States*

<sup>2</sup> *State Key Laboratory of Pollution Control and Resource Reuse, School of the Environment; Jiangsu Key Laboratory of Vehicle Emissions Control, School of Chemistry and Chemical Engineering; Center of Modern Analysis, Nanjing University, Nanjing 210023, China*

<sup>3</sup> *Department of Physics, Catalysis Cluster for Renewable Energy and Chemical Transformations (REACT), University of Central Florida, Orlando, FL 32816, United States*

<sup>4</sup> *Department of Chemical and Biological Engineering, Villanova University, Villanova, PA 19085, United States*

<sup>5</sup> *College of Engineering and Applied Sciences, Nanjing University, Nanjing, 210093, China*

<sup>6</sup> *BASF Corporation, Iselin, NJ 08830, United States*

<sup>7</sup> *Brewton-Parker College, Mount Vernon, GA 30445, United States*

<sup>8</sup> *National Synchrotron Light Source II (NSLS-II), Brookhaven National Laboratory, Upton, NY 11973, United States*

<sup>†</sup> Wei Tan, Shaohua Xie and Duy Le contributed equally to this work.

\*Corresponding author: fudong.liu@ucf.edu (F. Liu); Tel: 407-823-6219; Fax: 407-823-3315.

## Supplementary Information

**Supplementary Table 1** Linear combination fitting results of Pt L<sub>3</sub>-edge XANES for Pt/CeO<sub>2</sub>-X catalysts (X = 350, 550, 700 and 800).

| Samples                  | Ratio of PtO <sub>2</sub> | Ratio of Pt foil | Averaged valence state |
|--------------------------|---------------------------|------------------|------------------------|
| Pt/CeO <sub>2</sub> -350 | 0.906 ± 0.013             | 0.094 ± 0.009    | 3.6 ± 0.1              |
| Pt/CeO <sub>2</sub> -550 | 0.839 ± 0.013             | 0.161 ± 0.010    | 3.4 ± 0.1              |
| Pt/CeO <sub>2</sub> -700 | 0.733 ± 0.014             | 0.267 ± 0.011    | 2.9 ± 0.1              |
| Pt/CeO <sub>2</sub> -800 | 0.676 ± 0.013             | 0.324 ± 0.010    | 2.7 ± 0.1              |

## Supplementary Information

25 **Supplementary Table 2** Surface atomic concentration and surface chemical states determined by XPS.

| Samples                       | Surface atomic concentration (%) |      |     | Ce <sup>3+</sup> /total Ce | Pt <sup>2+</sup> /total Pt |
|-------------------------------|----------------------------------|------|-----|----------------------------|----------------------------|
|                               | O                                | Ce   | Pt  | (%)                        | (%)                        |
| <b>CeO<sub>2</sub></b>        | 71.3                             | 28.7 | -   | 19.2                       | -                          |
| <b>Pt/CeO<sub>2</sub>-350</b> | 71.2                             | 28.4 | 0.4 | 18.4                       | 36.4                       |
| <b>Pt/CeO<sub>2</sub>-550</b> | 71.2                             | 28.0 | 0.8 | 16.4                       | 79.2                       |
| <b>Pt/CeO<sub>2</sub>-700</b> | 70.5                             | 28.4 | 1.1 | 18.0                       | 86.8                       |
| <b>Pt/CeO<sub>2</sub>-800</b> | 71.0                             | 27.9 | 1.1 | 17.2                       | 87.5                       |

26

## Supplementary Information

27 **Supplementary Table 3** EXAFS fitting results for Pt/CeO<sub>2</sub>-X catalysts using Pt foil, PtO<sub>2</sub> as references.

| Sample                   | Shell   | CN <sup>a</sup> | R (Å) <sup>b</sup> | $\Delta E_0$ (eV) <sup>c</sup> | $\sigma^2$ (10 <sup>-3</sup> Å <sup>2</sup> ) <sup>e</sup> | R-factor <sup>e</sup> |
|--------------------------|---------|-----------------|--------------------|--------------------------------|------------------------------------------------------------|-----------------------|
| Pt foil                  | Pt-Pt   | 12.0 ± 0.8      | 2.76 ± 0.01        | 8.0 ± 0.5                      | 4.05 ± 0.53                                                | 0.003                 |
|                          | Pt-O    | 6.0 ± 0.7       | 2.01 ± 0.01        | 9.5 ± 1.1                      | 1.77 ± 1.42                                                |                       |
| PtO <sub>2</sub>         | Pt-O-Pt | 6.0 ± 0.7       | 3.10 ± 0.01        | 9.5 ± 1.1                      | 1.39 ± 1.37                                                | 0.010                 |
|                          | Pt-O    | 12.0 ± 1.4      | 3.65 ± 0.01        | 9.5 ± 1.1                      | 7.88 ± 5.21                                                |                       |
| Pt/CeO <sub>2</sub> -550 | Pt-O    | 5.1 ± 0.4       | 2.00 ± 0.01        | 7.8 ± 1.3                      | 1.29 ± 0.49                                                | 0.010                 |
|                          | Pt-O-Ce | 3.7 ± 0.3       | 3.11 ± 0.08        | -5.6 ± 7.4                     | 10.84 ± 4.12                                               |                       |
|                          | Pt-O    | 4.4 ± 0.3       | 2.00 ± 0.01        | 7.9 ± 1.9                      | 1.29 ± 0.49                                                |                       |
| Pt/CeO <sub>2</sub> -800 | Pt-O    | 4.4 ± 0.3       | 2.00 ± 0.01        | 7.9 ± 1.9                      | 1.29 ± 0.49                                                | 0.021                 |
|                          | Pt-O-Ce | 4.2 ± 0.3       | 3.10 ± 0.07        | -2.8 ± 6.8                     | 9.32 ± 3.05                                                |                       |

28 <sup>a</sup> Coordination number; <sup>b</sup> Bond length; <sup>c</sup> Energy shift; <sup>d</sup> Debye-Waller factor; <sup>e</sup> Goodness-of-fit index.



## Supplementary Information

29 **Supplementary Table 4** Parameters of NH<sub>3</sub>-TPD profiles on CeO<sub>2</sub>, Pt/CeO<sub>2</sub>-550 and Pt/CeO<sub>2</sub>-800.

| Samples                  | Peak area ratio (%) |         |          |          |
|--------------------------|---------------------|---------|----------|----------|
|                          | $\alpha$            | $\beta$ | $\gamma$ | $\delta$ |
| CeO <sub>2</sub>         | 16                  | 51      | 33       | /        |
| Pt/CeO <sub>2</sub> -550 | 4                   | 29      | 67       | /        |
| Pt/CeO <sub>2</sub> -800 | 1                   | 20      | 28       | 51       |

30

## Supplementary Information

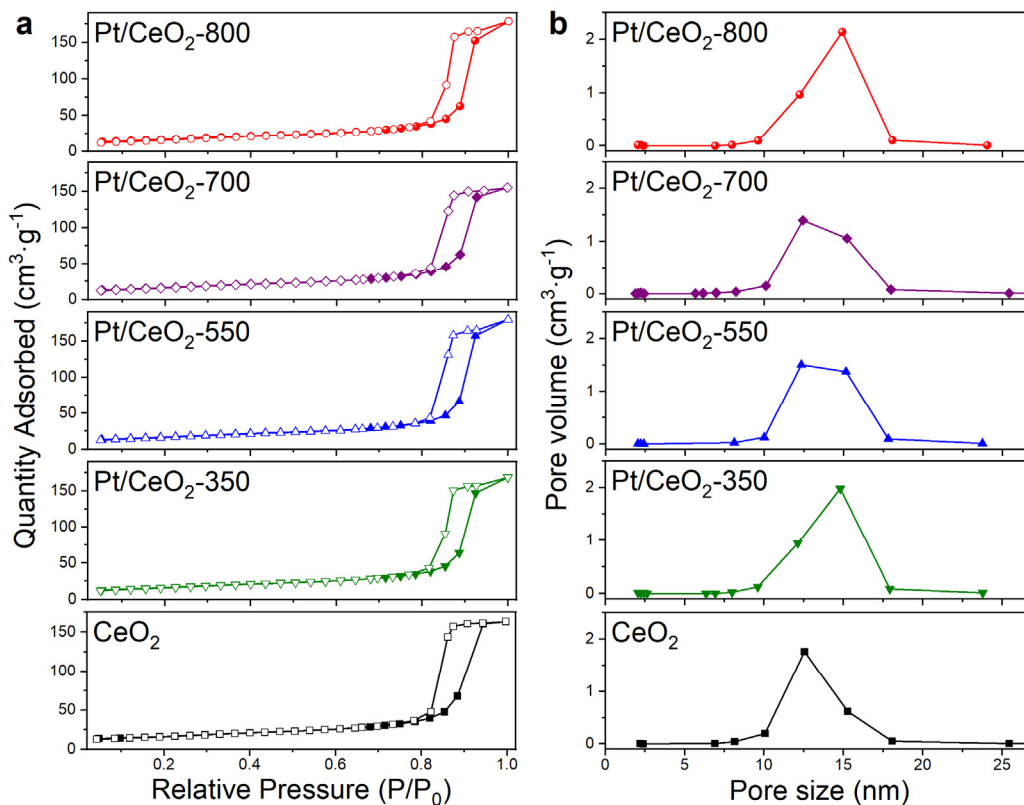

**Supplementary Fig. 1 N<sub>2</sub> physisorption results. (a)** Nitrogen adsorption-desorption isotherms and **(b)** BJH pore size distribution for CeO<sub>2</sub> and Pt/CeO<sub>2</sub>-X (X = 350, 550, 700 and 800).

**Notes:** CeO<sub>2</sub> and Pt/CeO<sub>2</sub>-X catalysts exhibited similar type IV isotherms with H1 hysteresis loops, indicating the mesoporous structure for these samples. Moreover, the pore size distributions on CeO<sub>2</sub> and Pt/CeO<sub>2</sub>-X catalysts were almost the same. Taking the similar specific surface areas of these samples into consideration (**Table 1**), it can be concluded that the textual structure of CeO<sub>2</sub> support did not change after the deposition of Pt and the following calcination at different temperatures, owing to the pre-calcination of CeO<sub>2</sub> support at 800 °C for 12 h before the catalyst preparation.

## Supplementary Information

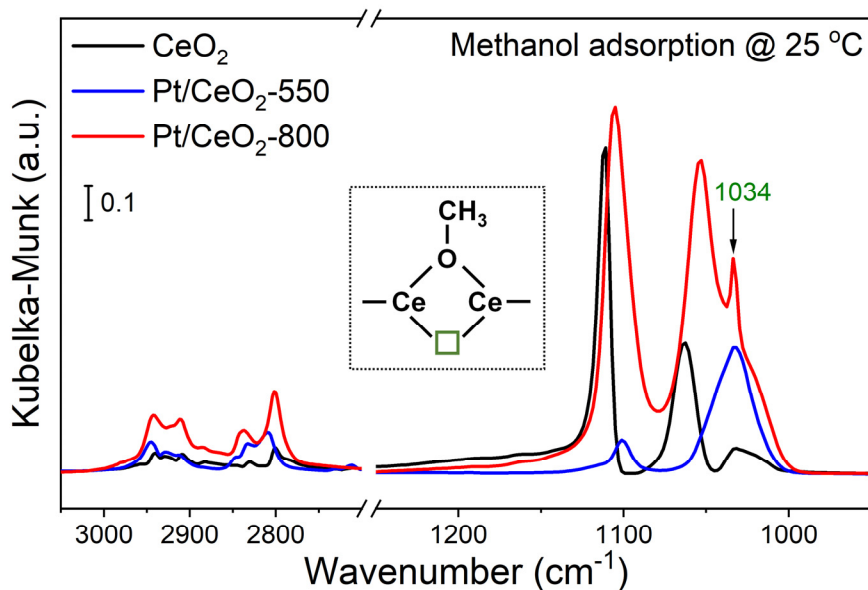

**Supplementary Fig. 2 Characterization of surface defects by methanol adsorption.** *In situ* DRIFTS

of methanol adsorption on CeO<sub>2</sub> support, Pt/CeO<sub>2</sub>-550 and Pt/CeO<sub>2</sub>-800 at 25 °C. The olive square

indicates the oxygen defects.

**Notes:** The band at 1034 cm<sup>-1</sup> could be assigned to bridging methoxy species on two Ce<sup>4+</sup> cations having an oxygen vacancy.<sup>1</sup> It was clearly observed that the band at 1034 cm<sup>-1</sup> on Pt/CeO<sub>2</sub>-800 showed much higher intensity than that on CeO<sub>2</sub> and Pt/CeO<sub>2</sub>-550, suggesting that more surface defects were formed on Pt/CeO<sub>2</sub>-800 catalyst. The higher concentration of surface defects on Pt/CeO<sub>2</sub>-800 could be induced by the incorporation of Pt ions into the surface lattice of CeO<sub>2</sub> support at high temperature.

## Supplementary Information

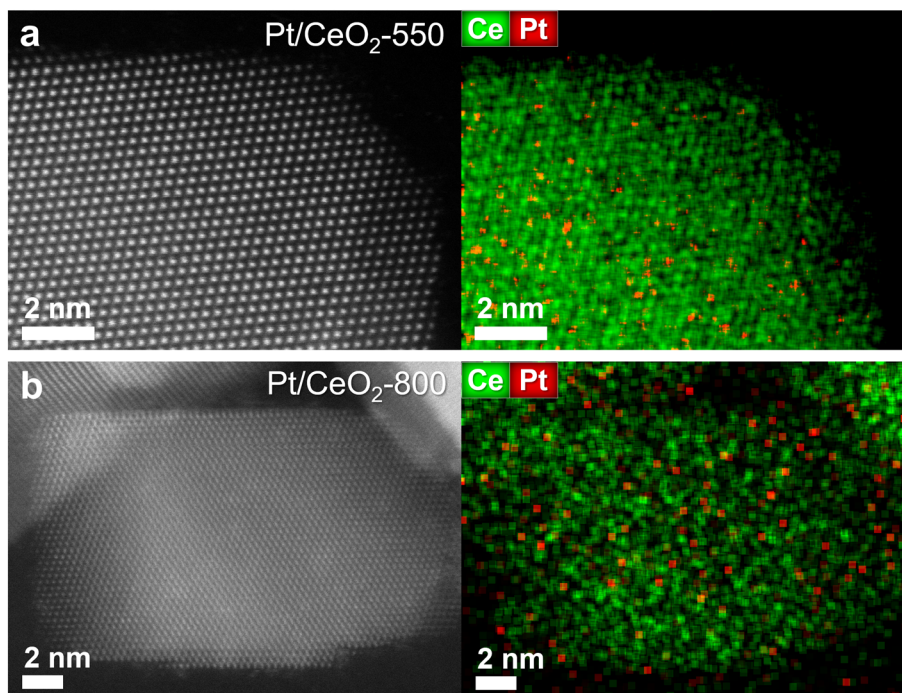

**Supplementary Fig. 3 Confirmation of Pt<sub>1</sub> status on CeO<sub>2</sub>.** AC-HAADF-STEM and corresponding high-resolution EDS mapping images for (a) Pt/CeO<sub>2</sub>-550 and (b) Pt/CeO<sub>2</sub>-800 catalysts.

# Supplementary Information

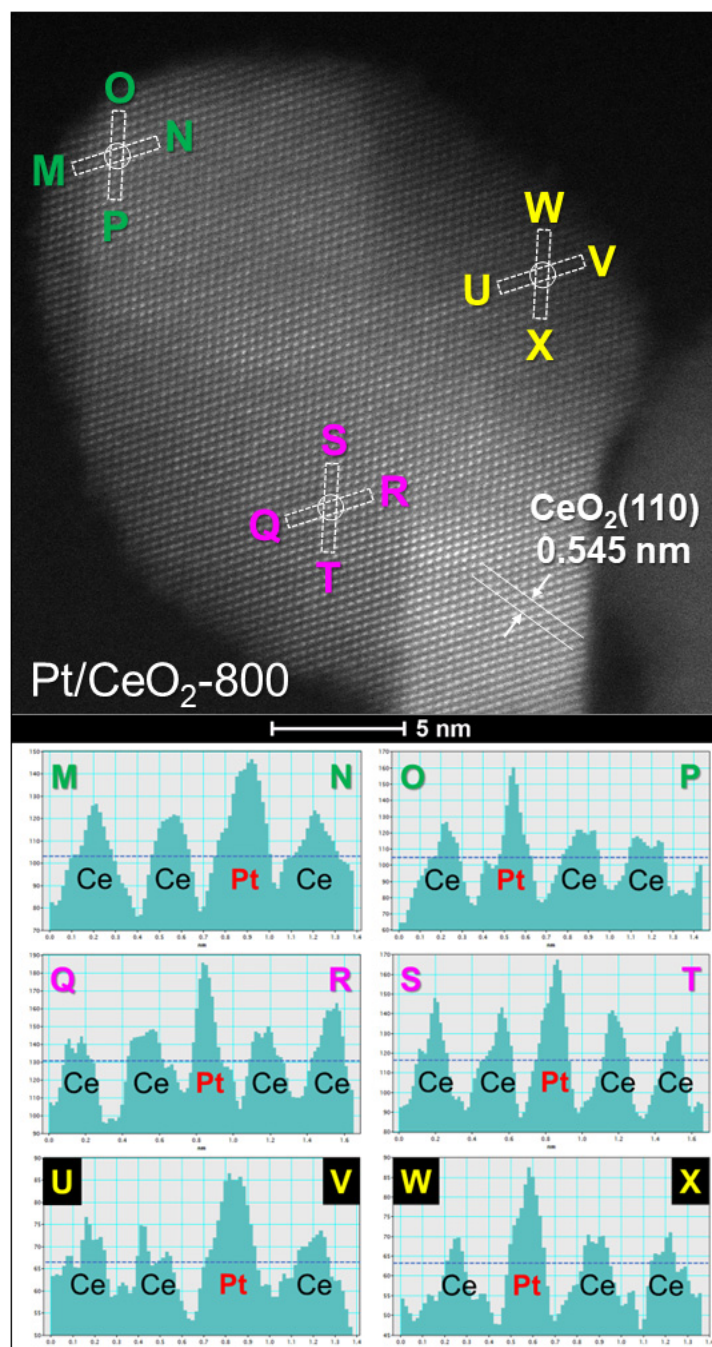

**Supplementary Fig. 4 Location of Pt<sub>1</sub> on CeO<sub>2</sub> within Pt/CeO<sub>2</sub>-800.** AC-HAADF-STEM image (above) and the line profiles (below) of Pt/CeO<sub>2</sub>-800 catalyst.

## Supplementary Information

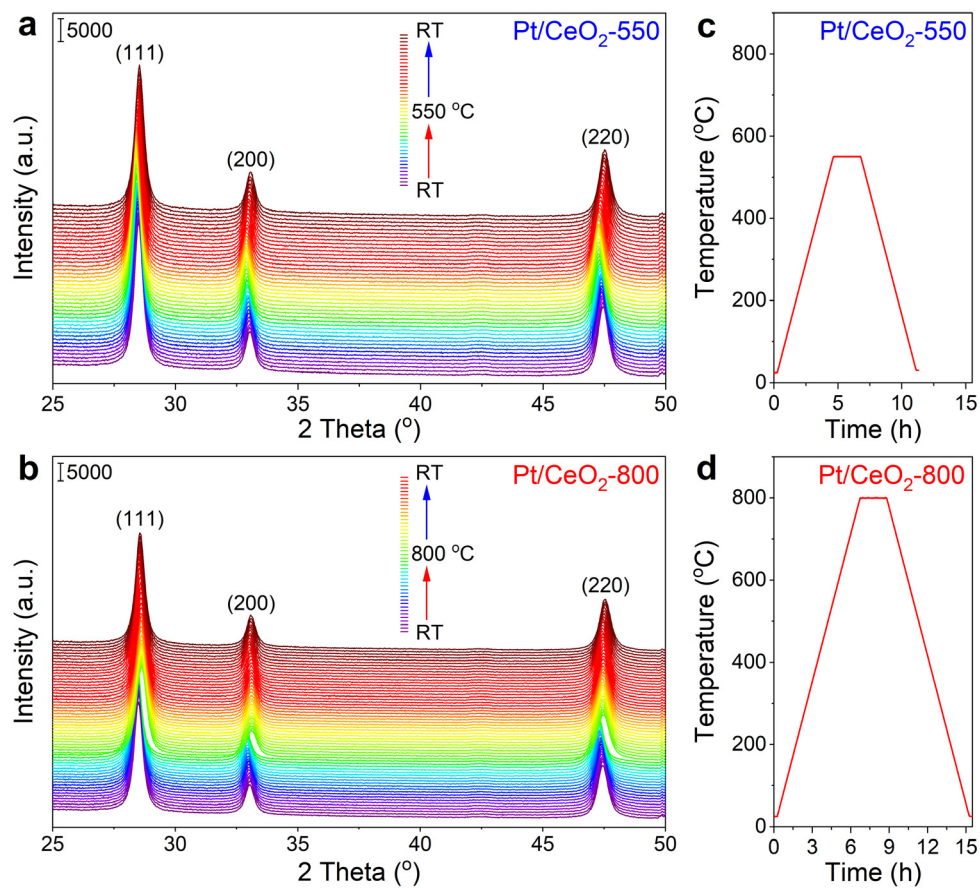

55

56 **Supplementary Fig. 5 Lattice structure of Pt<sub>1</sub>/CeO<sub>2</sub> catalysts.** *In situ* XRD patterns for (a) Pt/CeO<sub>2</sub>-  
 57 550 and (b) Pt/CeO<sub>2</sub>-800; Temperature-control programs for (c) Pt/CeO<sub>2</sub>-550 and (d) Pt/CeO<sub>2</sub>-800  
 58 during the *in situ* XRD experiments.



## Supplementary Information

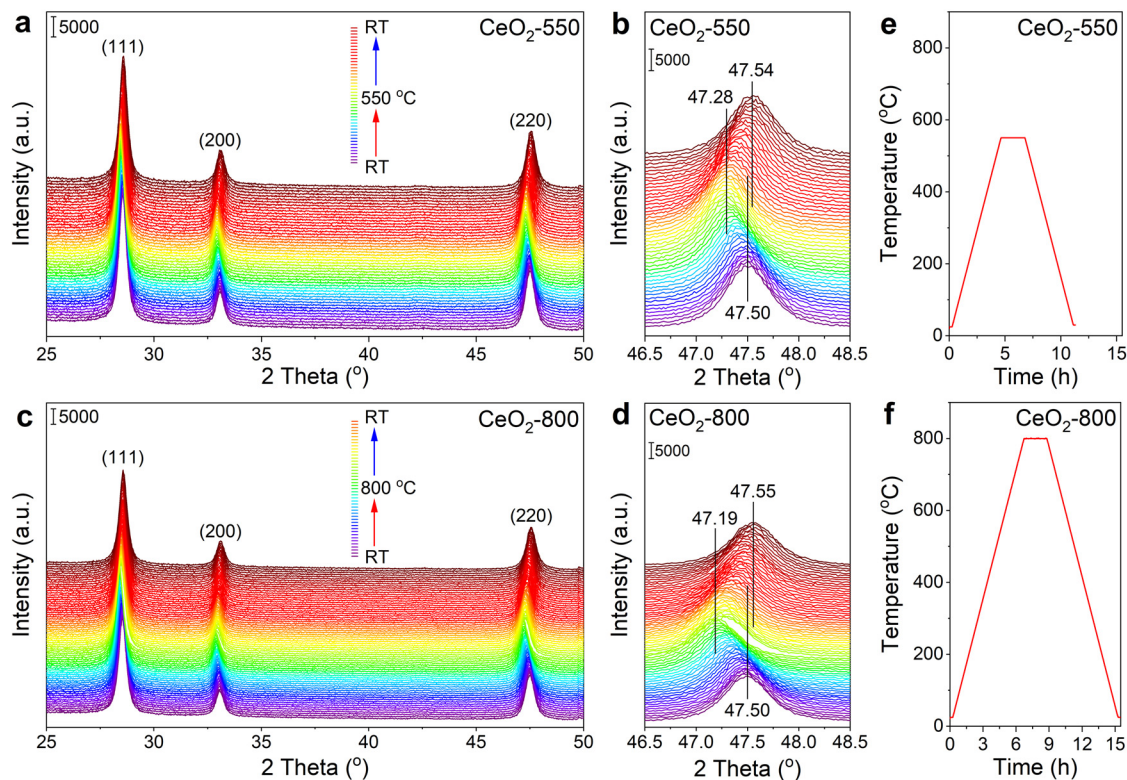

**Supplementary Fig. 6 Lattice structure of bare CeO<sub>2</sub> support.** *In situ* XRD patterns for bare CeO<sub>2</sub> support (a, b) under simulated calcination at 550 °C (labeled as CeO<sub>2</sub>-550) and (c, d) under simulated calcination at 800 °C (labeled as CeO<sub>2</sub>-800); Temperature-control programs during the *in situ* XRD experiments for (e) CeO<sub>2</sub>-550 and (f) CeO<sub>2</sub>-800.

**Notes:** The XRD peaks for CeO<sub>2</sub> showed a similar shift trend during the heating and cooling processes as those for Pt/CeO<sub>2</sub>-550 and Pt/CeO<sub>2</sub>-800 catalysts. For bare CeO<sub>2</sub> support, the shift of the XRD peaks to higher angles after calcination could be related to the desorption of surface adsorbed H<sub>2</sub>O. It is noteworthy that the shift of the XRD peaks on bare CeO<sub>2</sub> after 800 °C calcination (0.05 °) was much smaller than that on Pt/CeO<sub>2</sub>-800 (0.09 °), further supporting the viewpoint that Pt<sup>2+</sup> species with smaller ionic radius should have incorporated into the surface lattice of CeO<sub>2</sub> after 800 °C calcination which resulted in the surface lattice contraction of CeO<sub>2</sub>.

# Supplementary Information

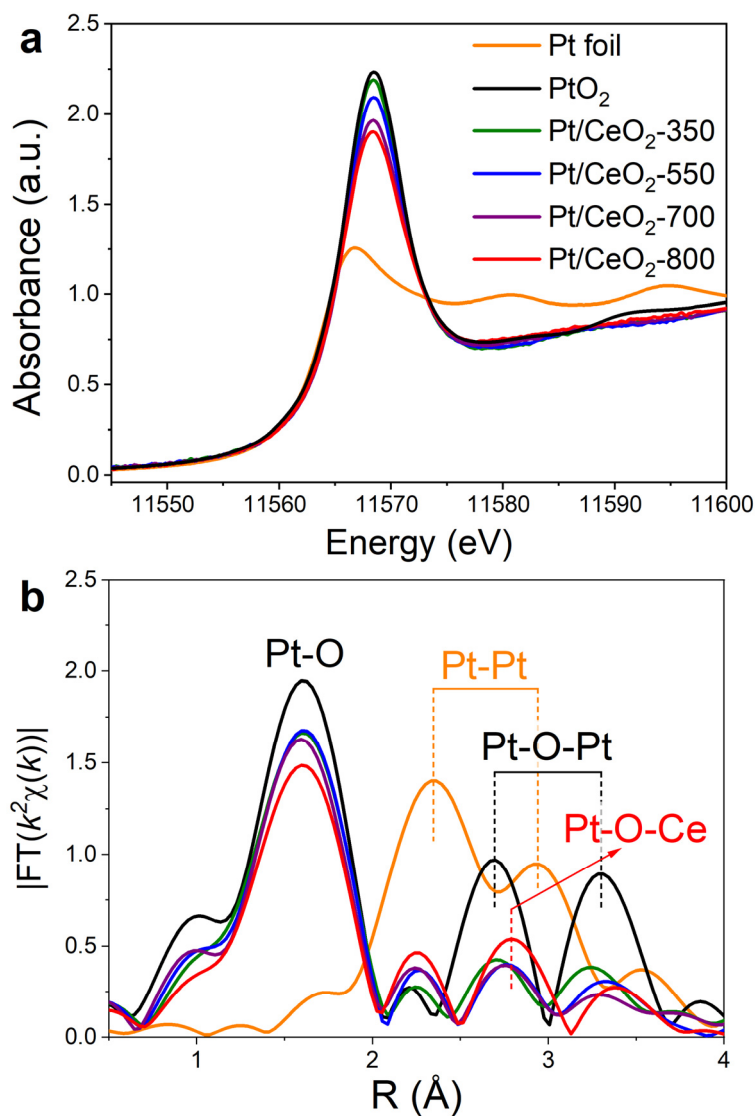

71

72 **Supplementary Fig. 7 Pt-L<sub>3</sub> edge XAS results.** (a) Normalized XANES and (b) EXAFS magnitude of  
 73 the Fourier transformed  $k^2$ -weighted  $\chi(k)$  data for Pt/CeO<sub>2</sub>-X at the Pt-L<sub>3</sub> edge (X = 350, 550, 700 and  
 74 800). Pt foil and PtO<sub>2</sub> references were used for comparison.



## Supplementary Information

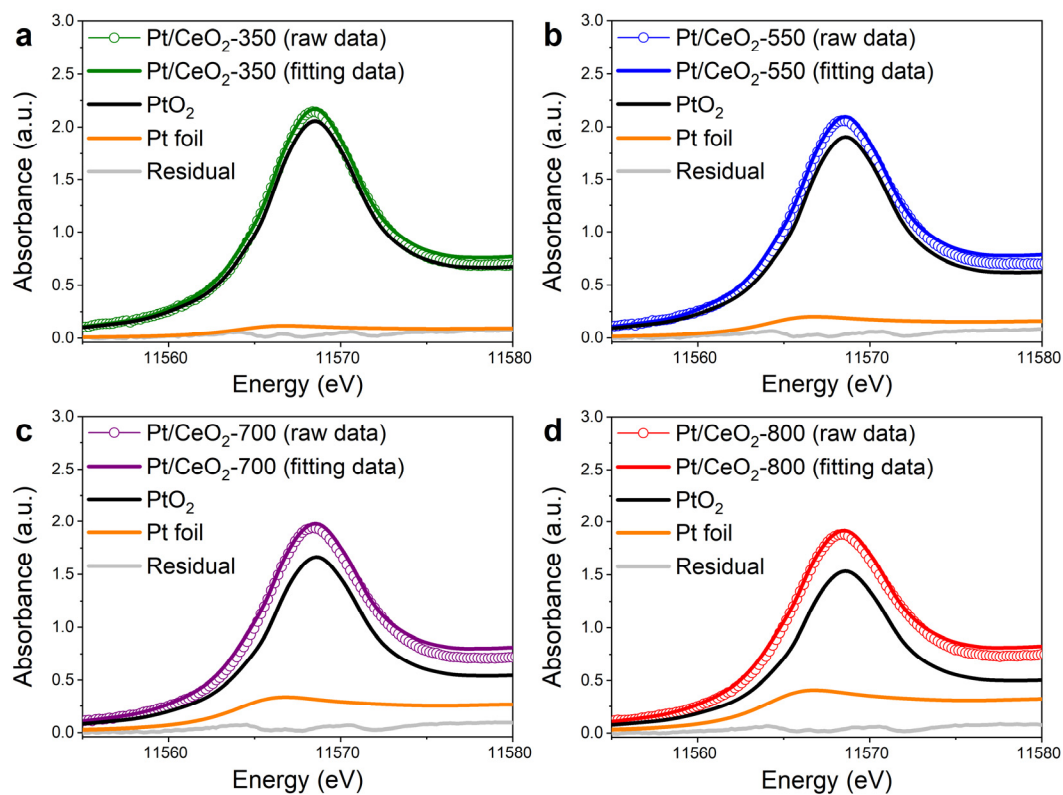

**Supplementary Fig. 8 Pt-L<sub>3</sub> edge XANES linear combination fitting results.** Linear combination fitting curves of Pt L<sub>3</sub>-edge XANES for (a) Pt/CeO<sub>2</sub>-350, (b) Pt/CeO<sub>2</sub>-550, (c) Pt/CeO<sub>2</sub>-700 and (d) Pt/CeO<sub>2</sub>-800. The detailed fitting results can be found in **Supplementary Table 1**.

## Supplementary Information

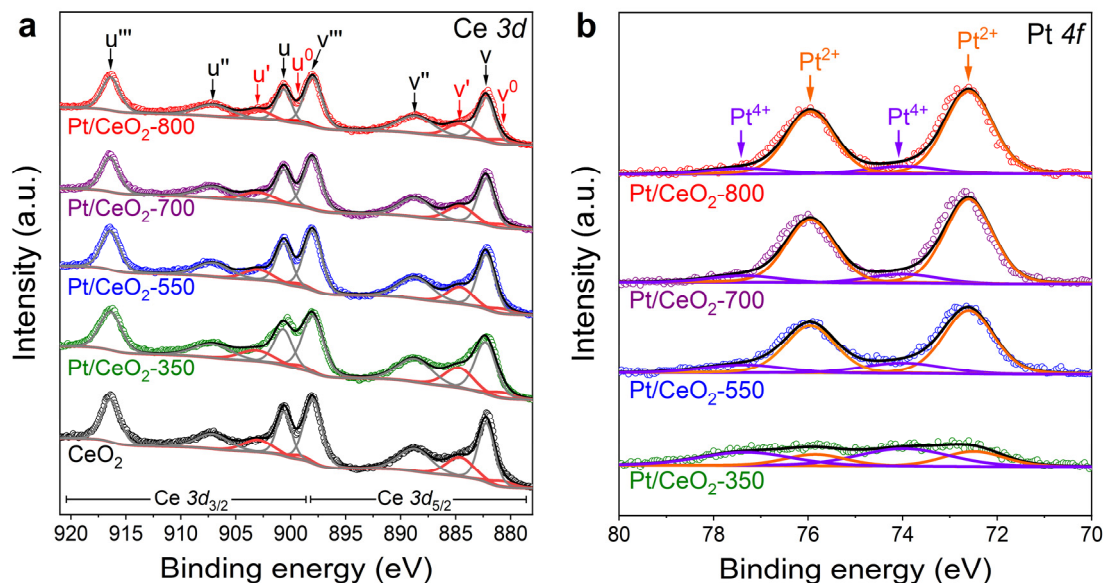

**Supplementary Fig. 9 Surface chemical states. (a)** XPS of Ce 3d on CeO<sub>2</sub> and Pt/CeO<sub>2</sub>-X catalysts;  
**(b)** XPS of Pt 4f on Pt/CeO<sub>2</sub>-X catalysts (X = 350, 550, 700 and 800).

**Notes:** As already illustrated in the *in situ* DRIFTS of CO adsorption section, the Pt species on Pt/CeO<sub>2</sub>-350 were in the form of clusters, and the Pt clusters could disperse into Pt single atoms when the calcination temperature reached 550 °C or higher. That was why the Pt 4f XPS for Pt/CeO<sub>2</sub>-550/700/800 showed much higher intensity than that for Pt/CeO<sub>2</sub>-350. The surface concentration of Pt atoms (**Supplementary Table 2**) on Pt/CeO<sub>2</sub>-550 (0.8%), Pt/CeO<sub>2</sub>-700 (1.1%) and Pt/CeO<sub>2</sub>-800 (1.1%) could be considered to be comparable. For Pt/CeO<sub>2</sub>-800, the Pt atoms were located at the surface substitution sites of Ce (instead of the bulk lattice of CeO<sub>2</sub>), therefore the Pt concentration on Pt/CeO<sub>2</sub>-800 was observed similar to that on Pt/CeO<sub>2</sub>-550/700.

## Supplementary Information

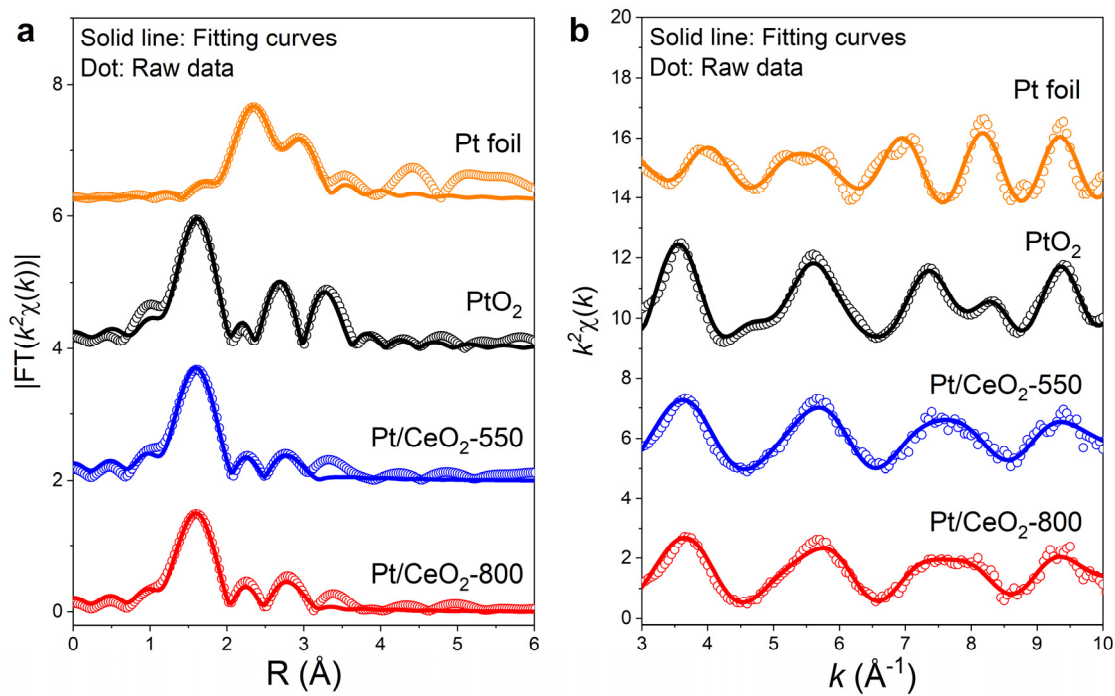

90

91 **Supplementary Fig. 10 Pt-L<sub>3</sub> edge EXAFS curve fitting results.** EXAFS fitting curves in (a) R-space  
 92 and (b)  $k$ -space at the Pt-L<sub>3</sub> edge. The detailed fitting results can be found in **Supplementary Table 3**.

## Supplementary Information

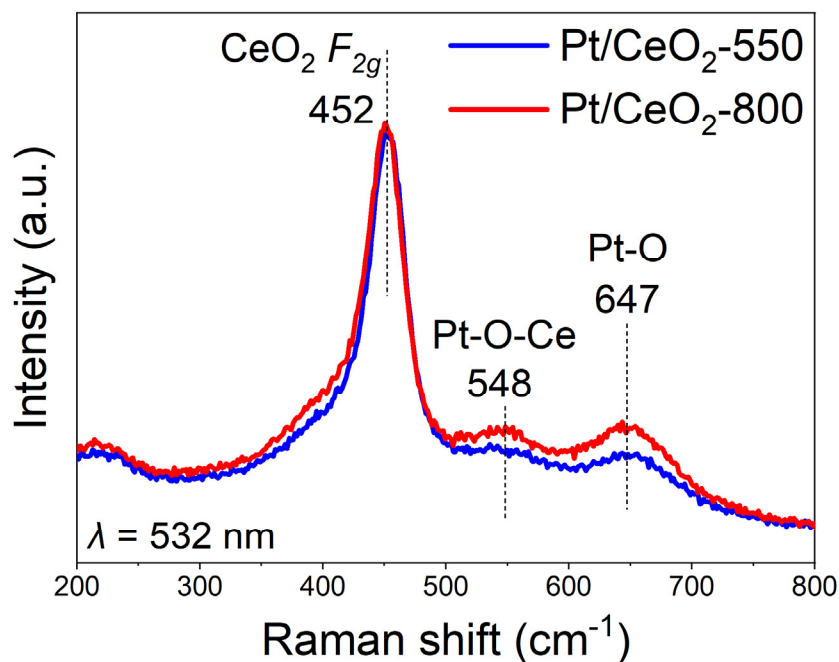

**Supplementary Fig. 11 Pt-O and Pt-O-Ce structures characterized by Raman spectra.** Raman spectra for Pt/CeO<sub>2</sub>-550 and Pt/CeO<sub>2</sub>-800.

**Notes:** Raman spectra for Pt/CeO<sub>2</sub>-550 and Pt/CeO<sub>2</sub>-800 were collected (**Supplementary Fig. 11**). The sharp band at *ca.* 452 cm<sup>-1</sup> could be assigned to the triply degenerated  $F_{2g}$  mode of fluorite-type CeO<sub>2</sub>.<sup>2</sup> The bands at *ca.* 548 and 647 cm<sup>-1</sup> could be attributed to Pt-O-Ce and Pt-O (in Pt-O-Ce) structures.<sup>3</sup> It was observed that the bands assigned to Pt-O-Ce and Pt-O (in Pt-O-Ce) on Pt/CeO<sub>2</sub>-800 showed higher intensity than those on Pt/CeO<sub>2</sub>-550, indicating that more Pt-O-Ce linkages were formed on Pt/CeO<sub>2</sub>-800, matching well with the EXAFS curve fitting results.

## Supplementary Information

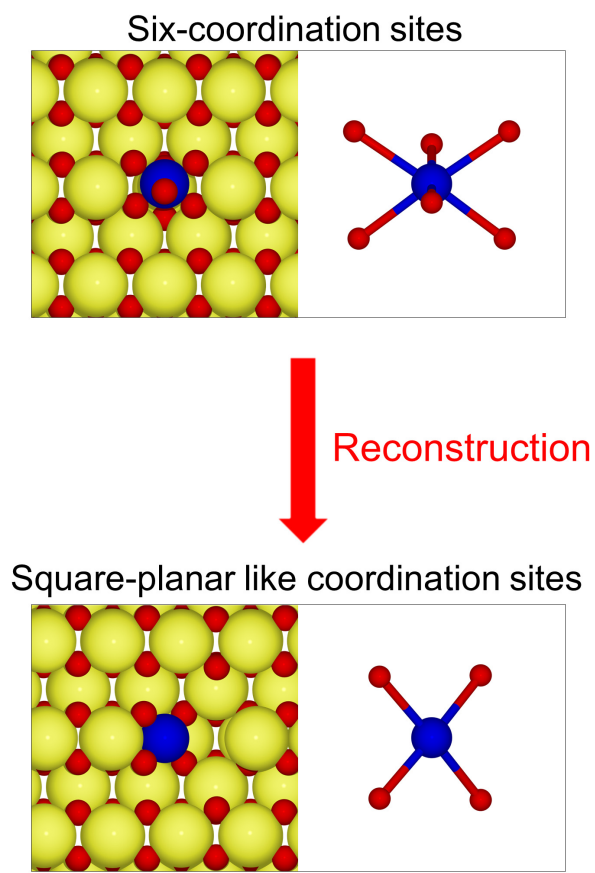

**Supplementary Fig. 12 Reconstruction of Pt<sub>1</sub> local coordination structure within Pt/CeO<sub>2</sub>-800.** The reconstruction of Pt single atoms on CeO<sub>2</sub> (110) from six-coordination sites to square-planar like coordination sites within Pt/CeO<sub>2</sub>-800.

# Supplementary Information

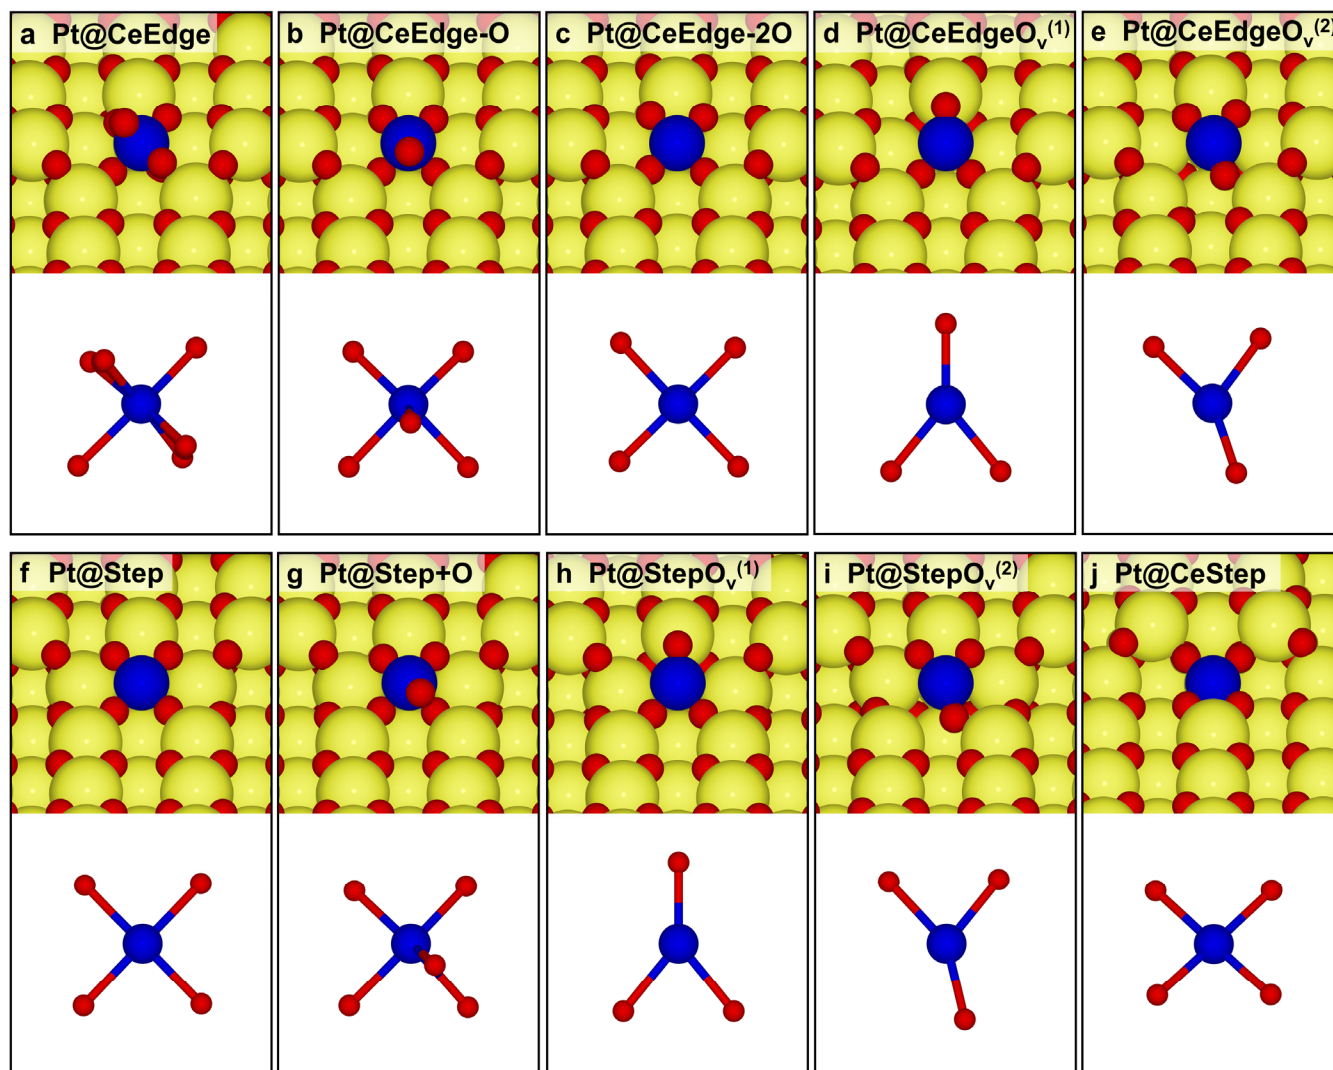

**Supplementary Fig. 13 Possible  $\text{Pt}_1/\text{CeO}_2$  configurations within  $\text{Pt}/\text{CeO}_2\text{-550}$ .** Possible geometries of Pt single atoms on  $\text{CeO}_2$  (110) (top: the top-view of structure; bottom: the coordination of Pt to O) within  $\text{Pt}/\text{CeO}_2\text{-550}$ . The name of each configuration is shown on the top left of each panel (**a-j**).



# Supplementary Information

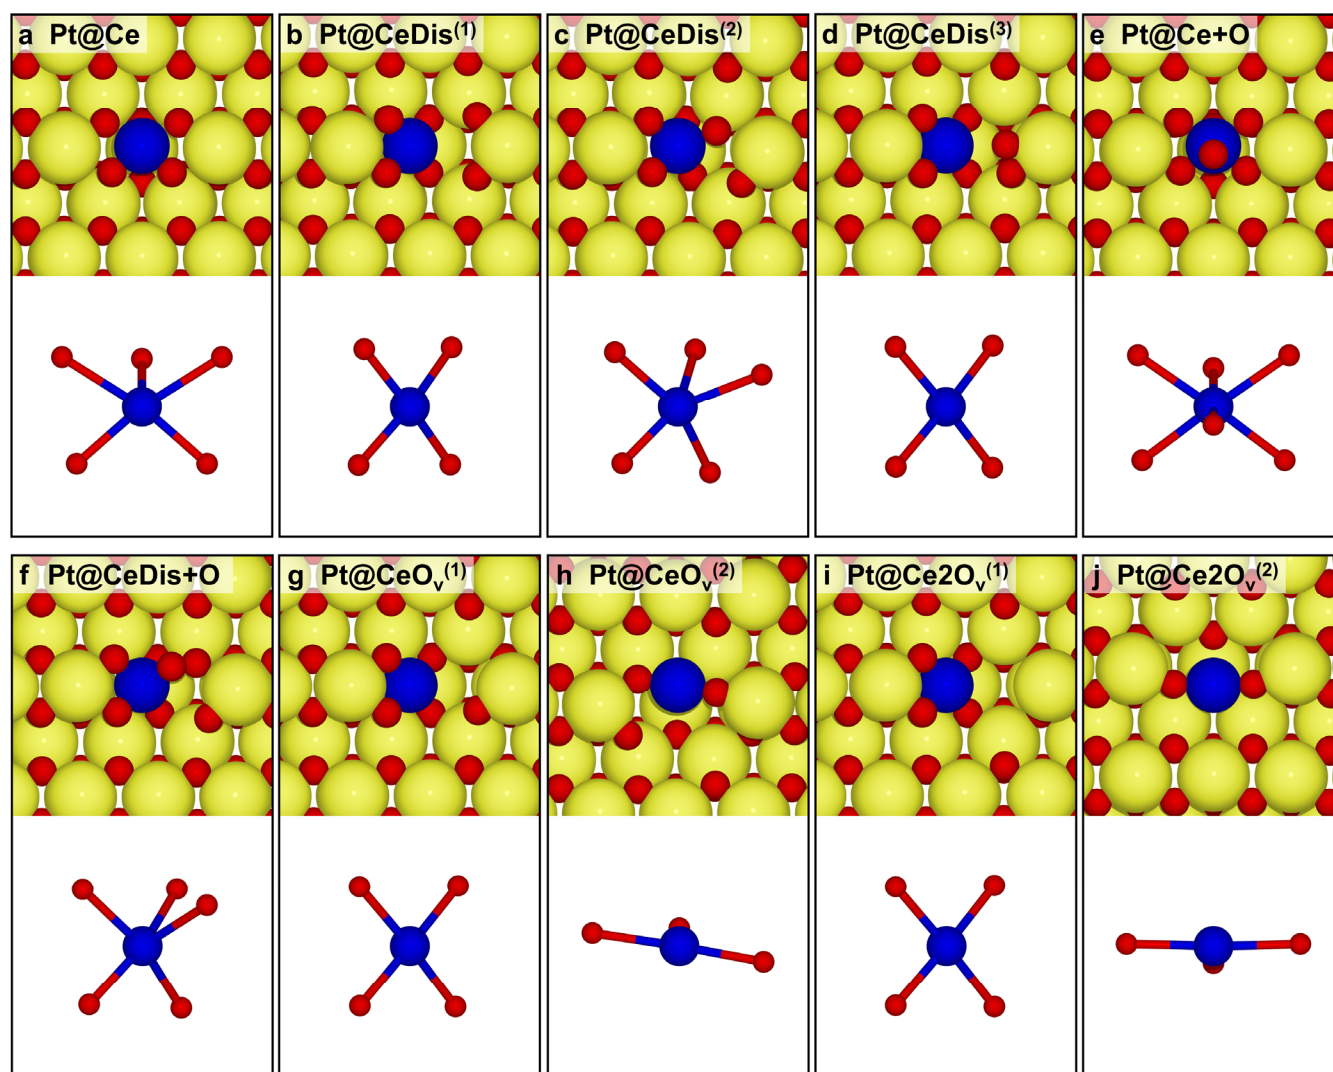

**Supplementary Fig. 14 Possible Pt<sub>1</sub>/CeO<sub>2</sub> configurations within Pt/CeO<sub>2</sub>-800.** Possible geometries of Pt single atoms on CeO<sub>2</sub> (110) (top: the top-view of structure; bottom: the coordination of Pt to O) within Pt/CeO<sub>2</sub>-800. The name of each configuration is shown on the top left of each panel (a-j).

## Supplementary Information

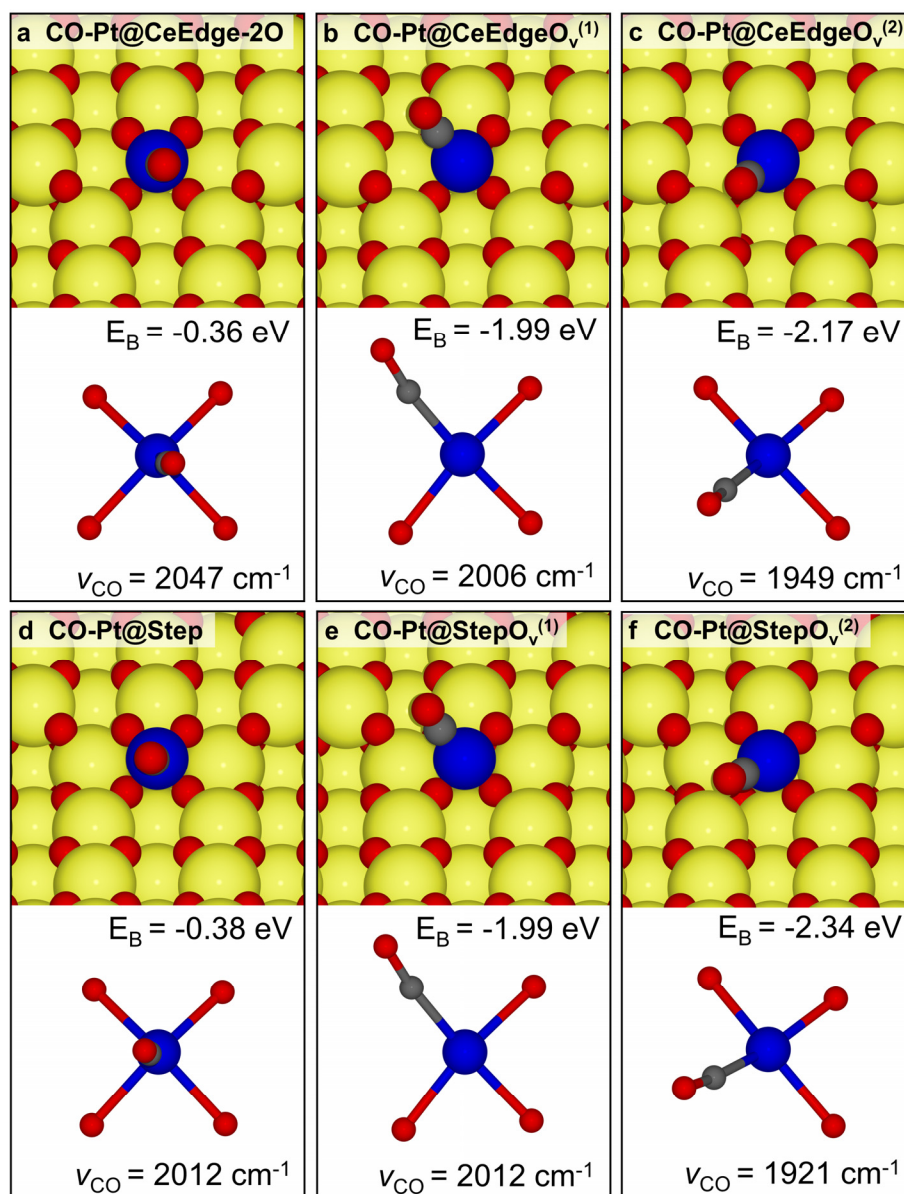

**Supplementary Fig. 15** Stretching frequency of CO adsorbed on different Pt<sub>1</sub>/CeO<sub>2</sub> configurations within Pt/CeO<sub>2</sub>-550. CO adsorption configurations in (a) CO-Pt@CeEdge-2O, (b) CO-Pt@CeEdgeO<sub>v</sub><sup>(1)</sup>, (c) CO-Pt@CeEdgeO<sub>v</sub><sup>(2)</sup>, (d) CO-Pt@Step, (e) CO-Pt@StepO<sub>v</sub><sup>(1)</sup>, (f) CO-Pt@StepO<sub>v</sub><sup>(2)</sup> and corresponding coordination of Pt atoms with the first neighbor O atoms/CO molecules on Pt<sub>1</sub>/CeO<sub>2</sub> at edge/step sites of CeO<sub>2</sub> (110) surface for Pt/CeO<sub>2</sub>-550 catalyst.



## Supplementary Information

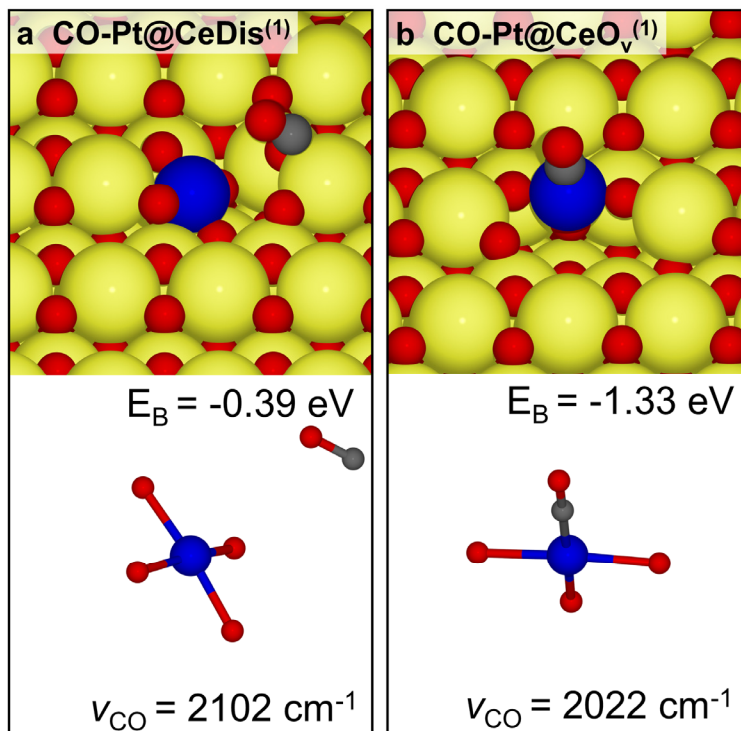

**Supplementary Fig. 16 Stretching frequency of CO adsorbed on different Pt<sub>1</sub>/CeO<sub>2</sub> configurations within Pt/CeO<sub>2</sub>-800.** CO adsorption configurations in **(a)** CO-Pt@CeDis<sup>(1)</sup>, **(b)** CO-Pt@CeO<sub>v</sub><sup>(1)</sup> and corresponding coordination of Pt atoms with the first neighbor O atoms/CO molecules on Pt<sub>1</sub>/CeO<sub>2</sub> at terrace sites of CeO<sub>2</sub> (110) surface for Pt/CeO<sub>2</sub>-800 catalyst.

## Supplementary Information

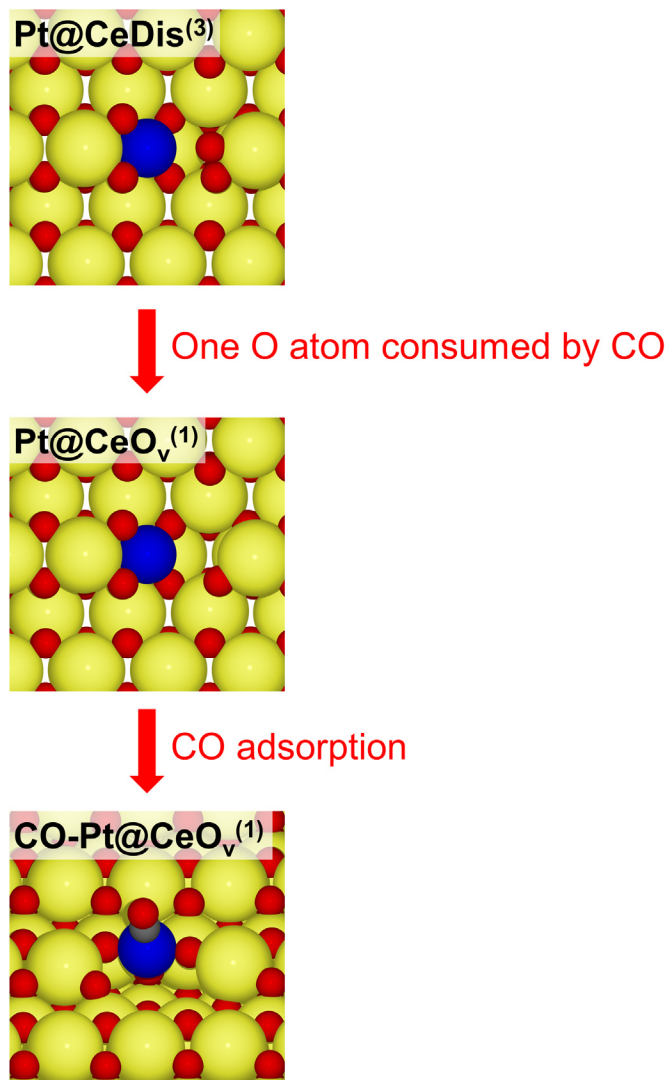

125

126 **Supplementary Fig. 17 Reconstruction of Pt@CeDis<sup>(3)</sup> configuration induced by CO adsorption.**

127 Scheme of the reconstruction process of Pt@CeDis<sup>(3)</sup> configuration within Pt/CeO<sub>2</sub>-800 under the CO

128 adsorption condition.

## Supplementary Information

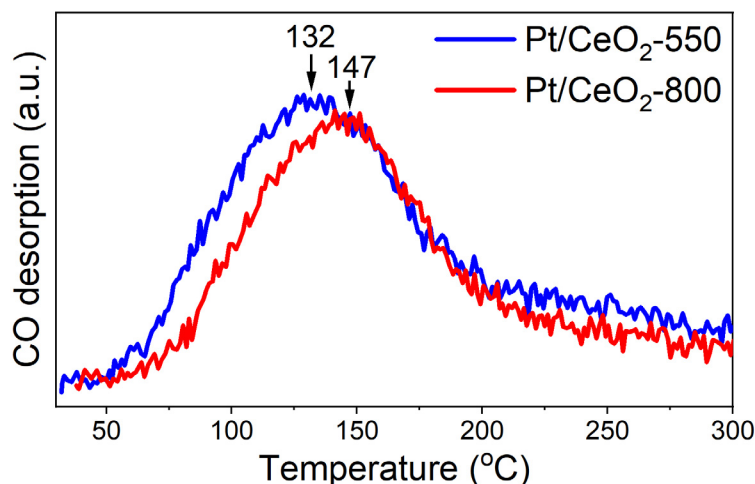

**Supplementary Fig. 18 CO adsorption strength determined by CO-TPD.** CO-TPD profiles on Pt/CeO<sub>2</sub>-550 and Pt/CeO<sub>2</sub>-800 catalysts.

**Notes:** As shown in **Supplementary Fig. 18**, the CO desorption peak on Pt/CeO<sub>2</sub>-800 centered at higher temperature (147 °C) than that on Pt/CeO<sub>2</sub>-550 (132 °C), suggesting that the adsorption of CO on Pt/CeO<sub>2</sub>-800 was indeed stronger than that on Pt/CeO<sub>2</sub>-550. The CO adsorption energy was further calculated by Redhead analysis using the equation as below:<sup>4</sup>

$$\frac{E}{RT_p} = \ln\left(\frac{\nu T_p}{\beta}\right) - 3.64$$

where E is the desorption energy and T<sub>p</sub> is the peak desorption temperature. The rate constant was previously determined as  $\nu = 10^{15} \text{ s}^{-1}$ . For other parameters,  $\beta = 10 \text{ K} \cdot \text{min}^{-1} = 0.167 \text{ K} \cdot \text{s}^{-1}$ , T<sub>p</sub> = 405 K (Pt/CeO<sub>2</sub>-550) and 420 K (Pt/CeO<sub>2</sub>-800).

Therefore, the CO adsorption energy on each catalyst was calculated as: E(Pt/CeO<sub>2</sub>-550) = 1.35 eV; E(Pt/CeO<sub>2</sub>-800) = 1.40 eV.

In brief summary, the adsorption of CO on Pt/CeO<sub>2</sub>-800 was stronger than that on Pt/CeO<sub>2</sub>-550, which was consistent with the DFT calculation results.

## Supplementary Information

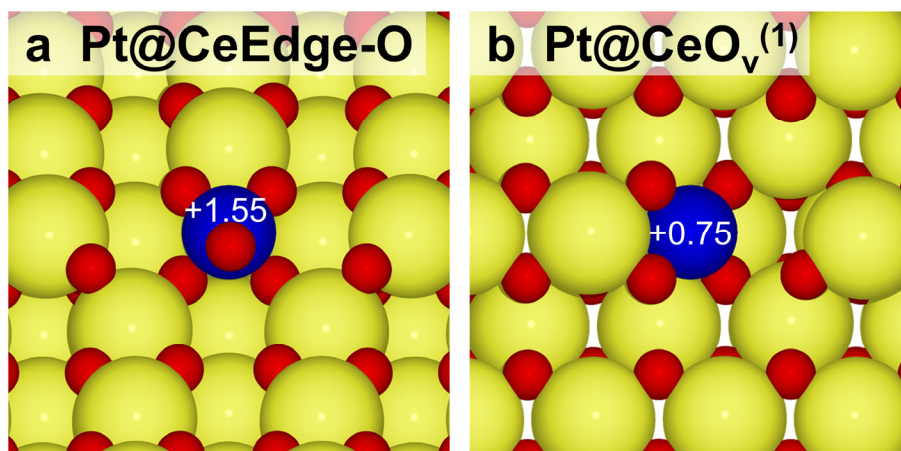

**Supplementary Fig. 19 Bader charge analysis for Pt<sub>1</sub> species.** Calculated Bader charges for Pt atoms in **(a)** Pt@CeEdge-O (representing Pt/CeO<sub>2</sub>-550 catalyst) and **(b)** Pt@CeO<sub>v</sub><sup>(1)</sup> (representing Pt/CeO<sub>2</sub>-800 catalyst).

**Notes:** The charges of Pt atoms in two configurations, *i.e.*, Pt@CeEdge-O (representing Pt/CeO<sub>2</sub>-550 catalyst) and Pt@CeO<sub>v</sub><sup>(1)</sup> (representing Pt/CeO<sub>2</sub>-800 catalyst), were evaluated using the Bader analysis, based on the method reported in literature.<sup>5, 6</sup>

## Supplementary Information

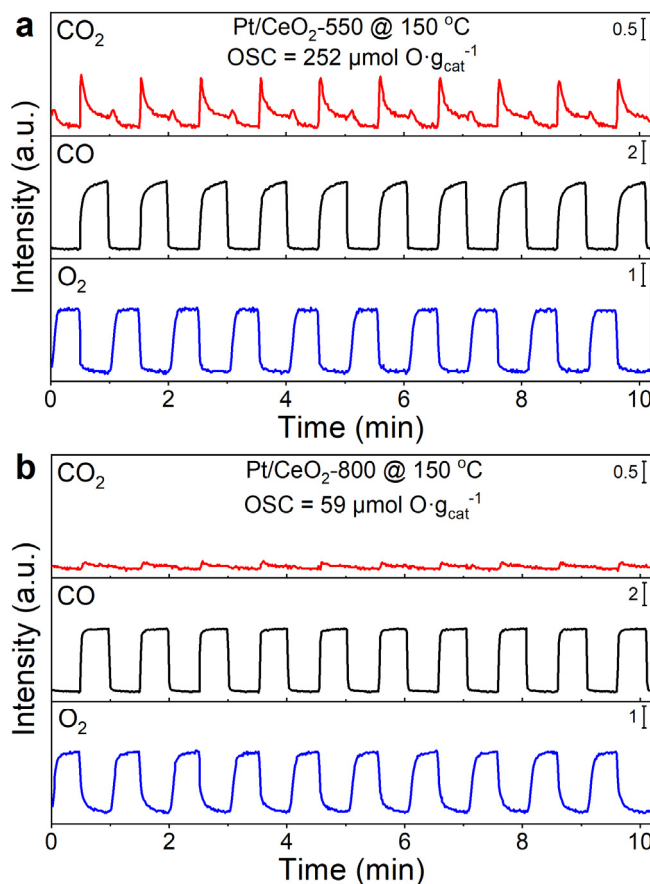

**Supplementary Fig. 20 Dynamic OSC testing results.** Signals of CO, O<sub>2</sub>, and CO<sub>2</sub> monitored by an online mass spectrometer in the dynamic OSC test for **(a)** Pt/CeO<sub>2</sub>-550 and **(b)** Pt/CeO<sub>2</sub>-800.

**Notes:** The dynamic oxygen storage capacity (OSC) test was performed at 150 °C, in which the catalysts were exposed to CO/O<sub>2</sub> cyclic flow and the CO<sub>2</sub> formation was monitored online (**Supplementary Fig. 20**). Much higher concentration of CO<sub>2</sub> was formed over Pt/CeO<sub>2</sub>-550 catalyst during the testing, suggesting the much higher dynamic OSC function of Pt/CeO<sub>2</sub>-550 (252 μmol O·g<sub>cat</sub><sup>-1</sup>) than that of Pt/CeO<sub>2</sub>-800 (59 μmol O·g<sub>cat</sub><sup>-1</sup>). O<sub>2</sub> could be better activated and transferred on Pt/CeO<sub>2</sub>-550 than on Pt/CeO<sub>2</sub>-800, which was one of the main reasons for the much higher CO oxidation activity on Pt/CeO<sub>2</sub>-550 catalyst.

## Supplementary Information

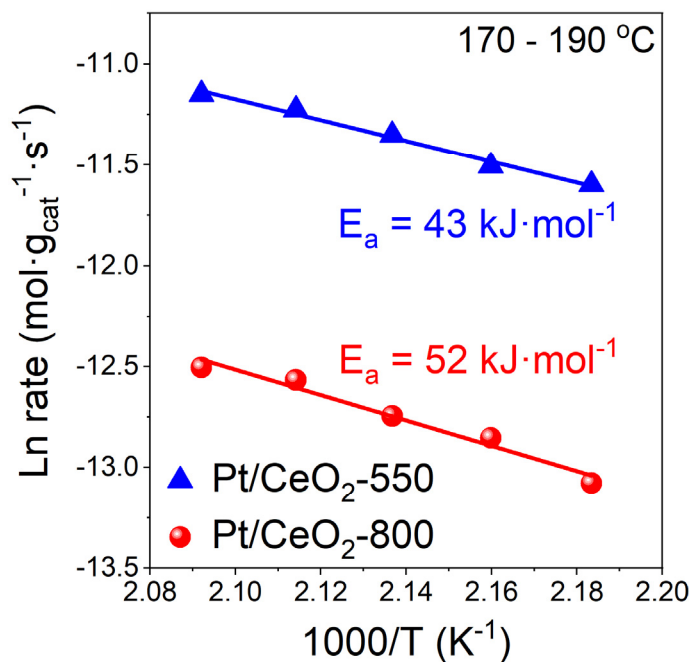

**Supplementary Fig. 21 Apparent activation energy ( $E_a$ ) for CO oxidation on Pt<sub>1</sub>/CeO<sub>2</sub> catalysts.**

Arrhenius plots and  $E_a$  values for CO oxidation on Pt/CeO<sub>2</sub>-550 and Pt/CeO<sub>2</sub>-800. [CO] = [O<sub>2</sub>] = 1 vol%, balanced with Ar. The WHSVs for CO oxidation testing on Pt/CeO<sub>2</sub>-550 and Pt/CeO<sub>2</sub>-800 were controlled at 800,000 and 400,000  $\text{mL} \cdot \text{g}_{\text{cat}}^{-1} \cdot \text{h}^{-1}$ , respectively.

## Supplementary Information

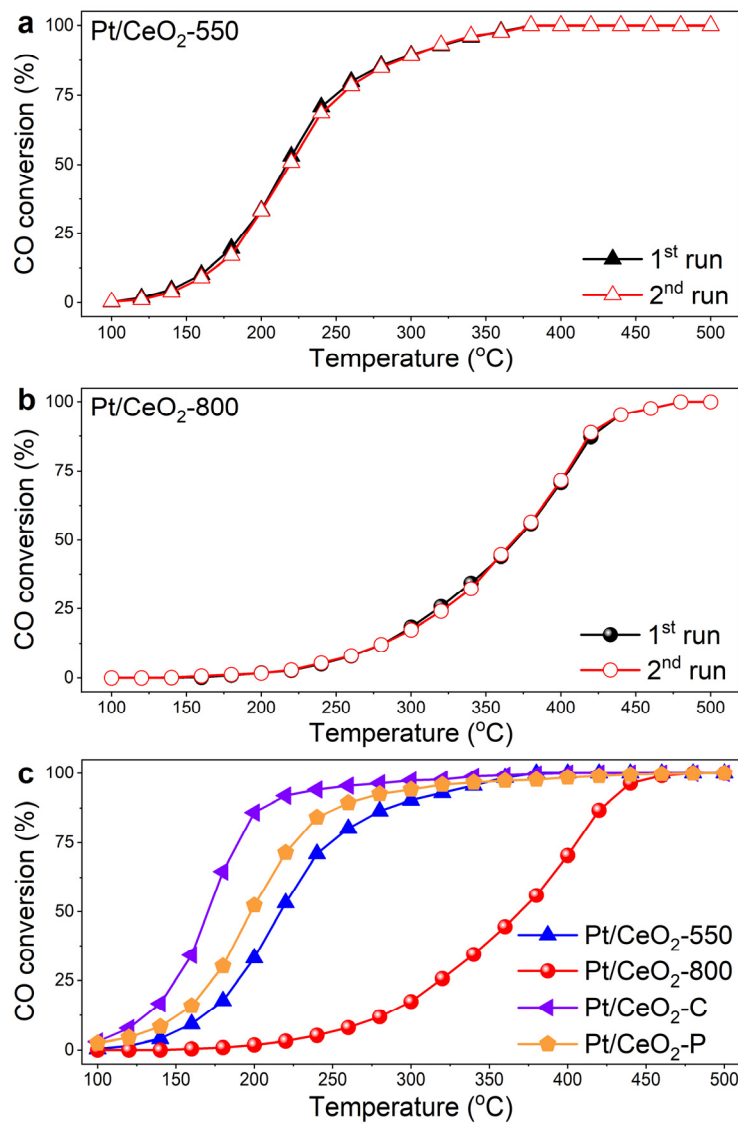

167

168

169

170

171

172

173

174

**Supplementary Fig. 22 Stability of Pt<sub>1</sub>/CeO<sub>2</sub> catalysts under CO oxidation atmosphere and CO oxidation activity on Pt/CeO<sub>2</sub> catalysts with different Pt dispersion states.** CO conversions on (a) Pt/CeO<sub>2</sub>-550 and (b) Pt/CeO<sub>2</sub>-800 during the two-round CO oxidation activity test; (c) CO oxidation activity on Pt/CeO<sub>2</sub>-550, Pt/CeO<sub>2</sub>-800, Pt/CeO<sub>2</sub>-C and Pt/CeO<sub>2</sub>-P. Reaction condition: [CO] = [O<sub>2</sub>] = 1 vol%, balanced with Ar, WHSV = 400,000 mL·g<sub>cat</sub><sup>-1</sup>·h<sup>-1</sup>.

**Notes:** To evaluate the stability of Pt<sub>1</sub>/CeO<sub>2</sub> catalysts in this work, a two-round CO oxidation activity test (from RT to 500 °C) was conducted on both Pt/CeO<sub>2</sub>-550 and Pt/CeO<sub>2</sub>-800. As shown in **Supplementary**

## Supplementary Information

175 **Fig. 22a-b**, the CO oxidation activity on Pt/CeO<sub>2</sub>-550 and Pt/CeO<sub>2</sub>-800 showed almost no change during  
176 the two rounds of tests, suggesting that the Pt<sub>1</sub>/CeO<sub>2</sub> catalysts prepared in this work showed high stability  
177 under the CO oxidation conditions.

178 To compare the CO oxidation activity on Pt single atom, cluster and nanoparticle catalysts, we prepared  
179 CeO<sub>2</sub> supported Pt clusters (Pt/CeO<sub>2</sub>-C) and nanoparticles (Pt/CeO<sub>2</sub>-P) as well. The Pt clusters (1-2 nm)  
180 were synthesized according to the previously reported method.<sup>7</sup> The solution of Pt colloidal (4-6 nm) was  
181 used as the precursor of Pt nanoparticles. As shown in **Supplementary Fig. 22c**, the Pt cluster catalyst  
182 showed higher CO oxidation activity than the Pt nanoparticle catalyst. Both Pt clusters and Pt  
183 nanoparticles performed better CO oxidation performance than Pt single atoms on Pt/CeO<sub>2</sub>-550 and  
184 Pt/CeO<sub>2</sub>-800, which could also suggest that the Pt single atoms did not aggregate into Pt clusters or  
185 nanoparticles during the two-round CO oxidation activity test.



## Supplementary Information

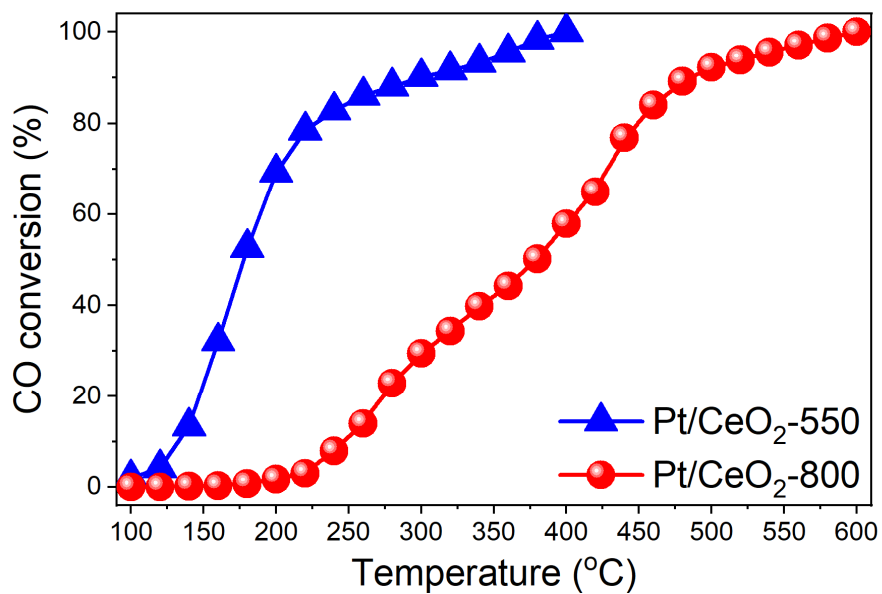

**Supplementary Fig. 23 CO oxidation activity evaluated under wet condition.** CO oxidation performance on Pt/CeO<sub>2</sub>-550 and Pt/CeO<sub>2</sub>-800 catalysts under wet condition: [CO] = 1%, [O<sub>2</sub>] = 1%, [H<sub>2</sub>O] = 5%, balanced with Ar, WHSV = 400,000 mL·g<sub>cat</sub><sup>-1</sup>·h<sup>-1</sup>.

### Supplementary Information

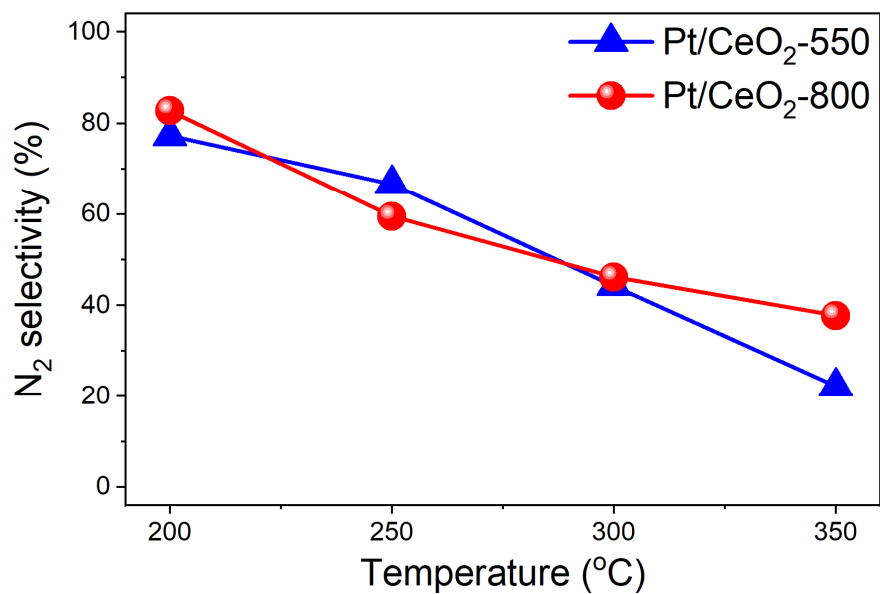

190

191

192

193

**Supplementary Fig. 24 N<sub>2</sub> selectivity in NH<sub>3</sub> oxidation reaction on Pt<sub>1</sub>/CeO<sub>2</sub> catalysts.** The N<sub>2</sub> selectivity in NH<sub>3</sub> oxidation reaction on Pt/CeO<sub>2</sub>-550 and Pt/CeO<sub>2</sub>-800 (Reaction condition: [NH<sub>3</sub>] = 500 ppm, [O<sub>2</sub>] = 5 %, balanced with Ar, WHSV = 200,000 mL·g<sub>cat</sub><sup>-1</sup>·h<sup>-1</sup>).

## Supplementary Information

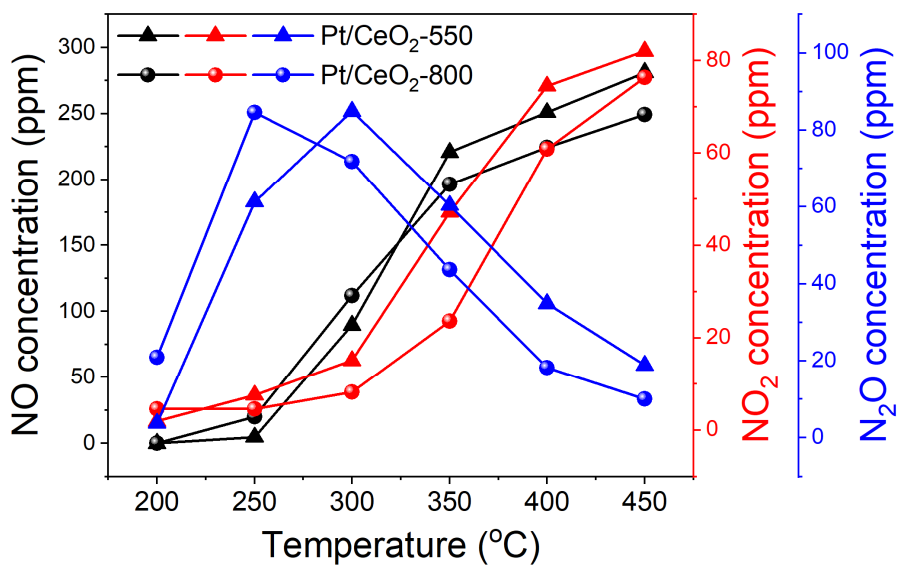

**Supplementary Fig. 25 Formation of non-selective oxidation products in NH<sub>3</sub> oxidation reaction.**

The formation of NO, NO<sub>2</sub> and N<sub>2</sub>O as a function of temperature in NH<sub>3</sub> oxidation reaction on Pt/CeO<sub>2</sub>-550 and Pt/CeO<sub>2</sub>-800 catalysts.

## Supplementary Information

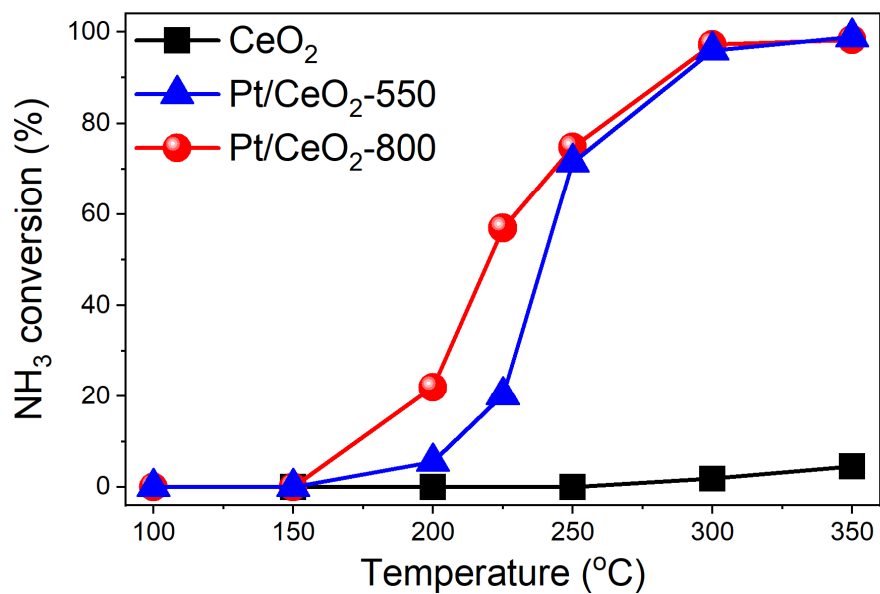

**Supplementary Fig. 26 NH<sub>3</sub> oxidation activity evaluated under wet condition.** NH<sub>3</sub> oxidation

performance on Pt/CeO<sub>2</sub>-550 and Pt/CeO<sub>2</sub>-800 catalysts as well as CeO<sub>2</sub> support under wet condition:

[NH<sub>3</sub>] = 500 ppm, [O<sub>2</sub>] = 5%, [H<sub>2</sub>O] = 5%, balanced with Ar, WHSV = 200,000 mL·g<sub>cat</sub><sup>-1</sup>·h<sup>-1</sup>.

## Supplementary Information

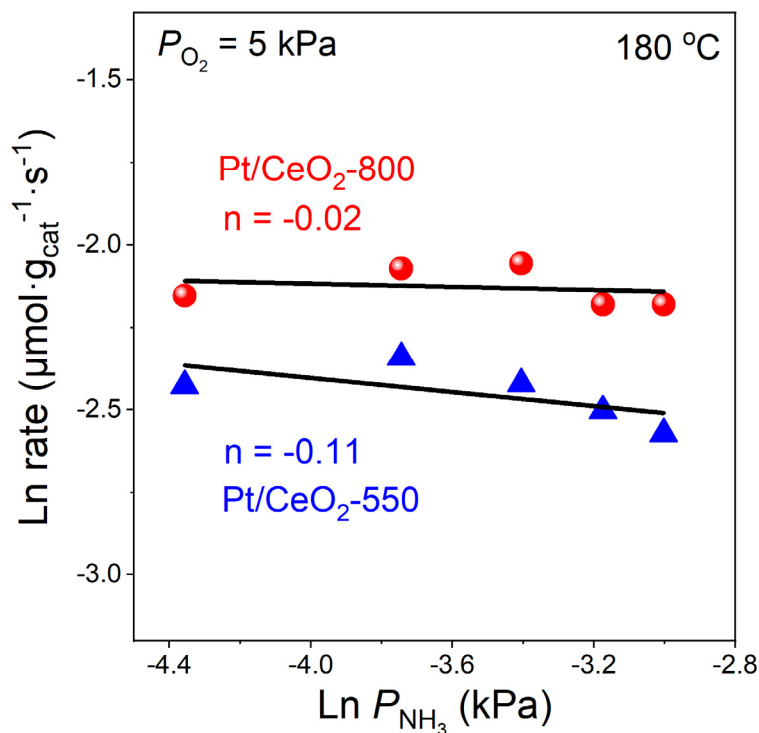

202

203 **Supplementary Fig. 27 Kinetics study of NH<sub>3</sub> oxidation on Pt<sub>1</sub>/CeO<sub>2</sub> catalysts.** The NH<sub>3</sub> reaction  
 204 order in NH<sub>3</sub> oxidation reaction on Pt/CeO<sub>2</sub>-550 and Pt/CeO<sub>2</sub>-800 catalysts. To avoid heat transfer  
 205 effects, the reaction rates were determined with the NH<sub>3</sub> conversions below 15%. Reaction temperature  
 206 was fixed at 180 °C. Reaction conditions: [NH<sub>3</sub>] = 100 to 500 ppm, [O<sub>2</sub>] = 5 vol%, balanced with Ar,  
 207 WHSV = 600,000 mL·g<sub>cat</sub><sup>-1</sup>·h<sup>-1</sup>.

208 **Notes:** Since the concentration of O<sub>2</sub> is usually much higher than that of NH<sub>3</sub> in typical NH<sub>3</sub> oxidation  
 209 reaction, we did not measure the O<sub>2</sub> reaction order in this study.

## Supplementary Information

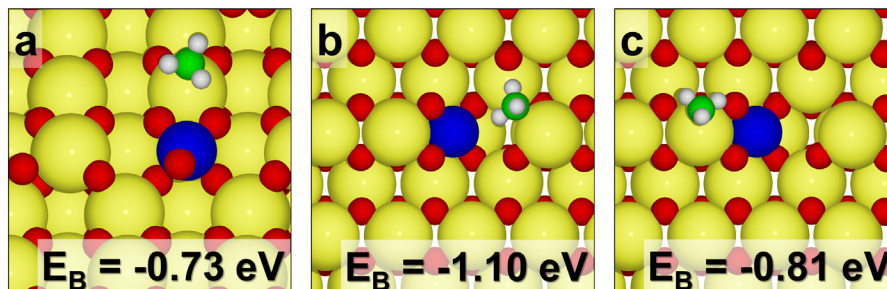

**Supplementary Fig. 28** NH<sub>3</sub> adsorption by DFT simulations. NH<sub>3</sub> adsorption energy on (a)

Pt@CeEdge-O and (b, c) Pt@CeO<sub>v</sub><sup>(1)</sup> configurations.

213 **Notes:** It was found that NH<sub>3</sub> could not adsorb on the Pt atoms but could adsorb on the nearby Ce atoms  
214 for both Pt@CeEdge-O and Pt@CeO<sub>v</sub><sup>(1)</sup> configurations. On Pt@CeO<sub>v</sub><sup>(1)</sup> configuration, the NH<sub>3</sub> adsorption  
215 energy on Ce atoms with (Supplementary Fig. 28b) and without (Supplementary Fig. 28c) oxygen  
216 vacancy nearby was calculated as -1.10 eV and -0.81 eV, respectively. Since NH<sub>3</sub> was found to bind  
217 stronger on the Ce sites with oxygen vacancy nearby, the DFT calculation on NH<sub>3</sub> oxidation mechanism  
218 over Pt@CeO<sub>v</sub><sup>(1)</sup> structure (representing Pt/CeO<sub>2</sub>-800 catalyst) was started from this configuration  
219 (Supplementary Fig. 28b).

## Supplementary Information

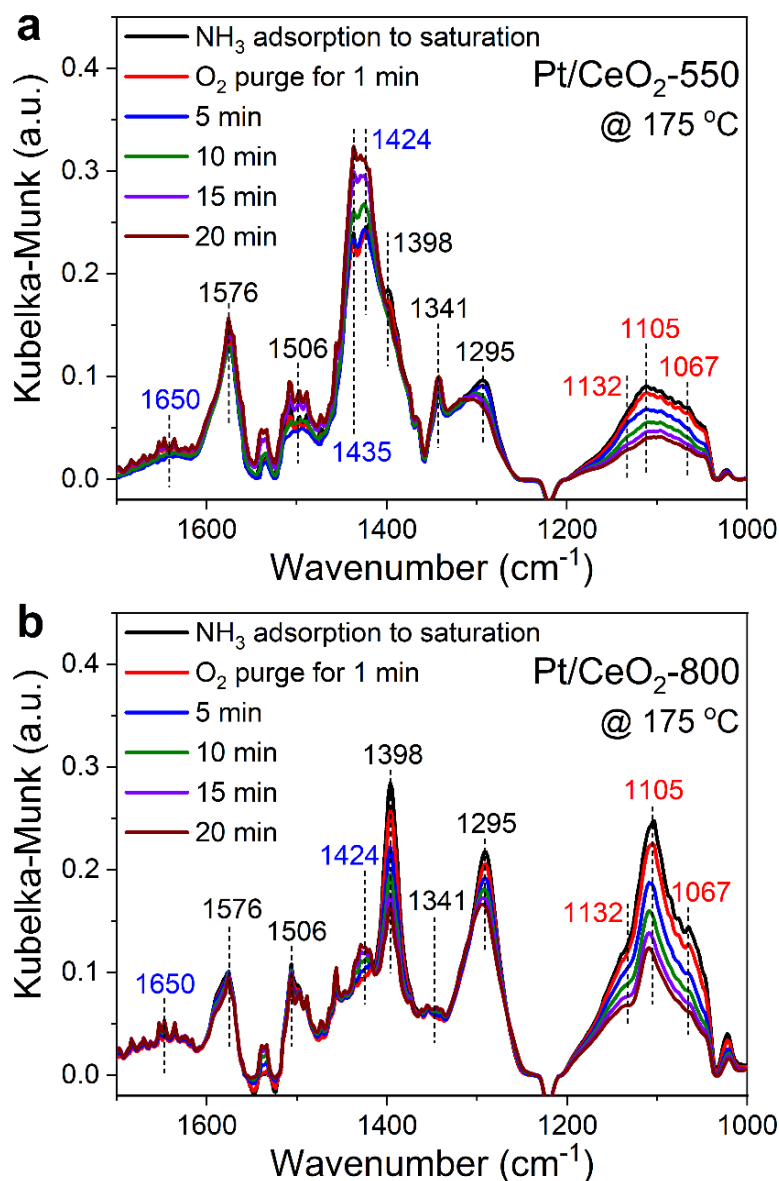

220

221 **Supplementary Fig. 29 Reactivity of adsorbed NH<sub>3</sub> species on Pt<sub>1</sub>/CeO<sub>2</sub> catalysts.** *In situ* DRIFTS of  
 222 O<sub>2</sub> reacting with pre-adsorbed NH<sub>3</sub> on **(a)** Pt/CeO<sub>2</sub>-550 and **(b)** Pt/CeO<sub>2</sub>-800 at 175 °C (before  
 223 introducing O<sub>2</sub> to the DRIFTS cell, the catalysts saturated with NH<sub>3</sub> were purged by Ar to remove  
 224 physically/weakly adsorbed NH<sub>3</sub>).

# Supplementary Information

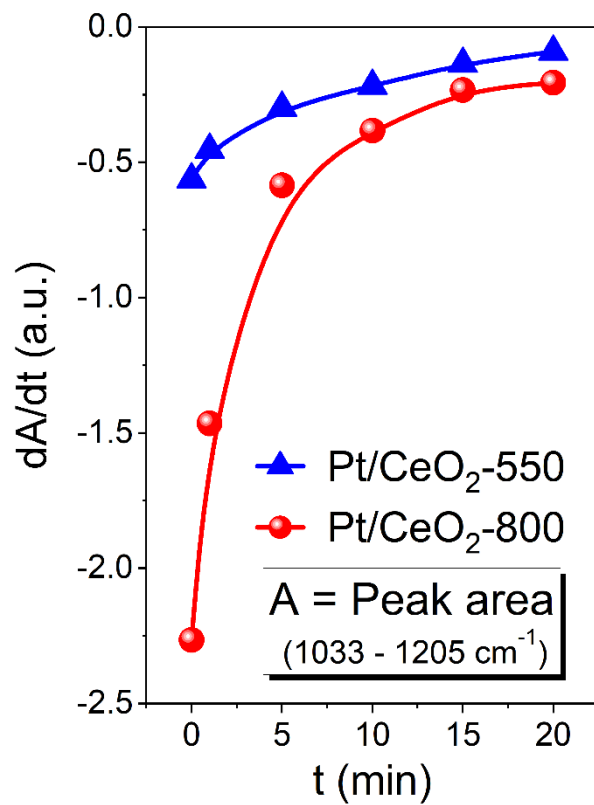

225

226 **Supplementary Fig. 30** Relative reaction rate of pre-adsorbed NH<sub>3</sub> species reacting with O<sub>2</sub>. First-  
 227 order derivative of peak area (1033-1205 cm<sup>-1</sup>) in **Supplementary Fig. 29** with respect to reaction time.



## Supplementary Information

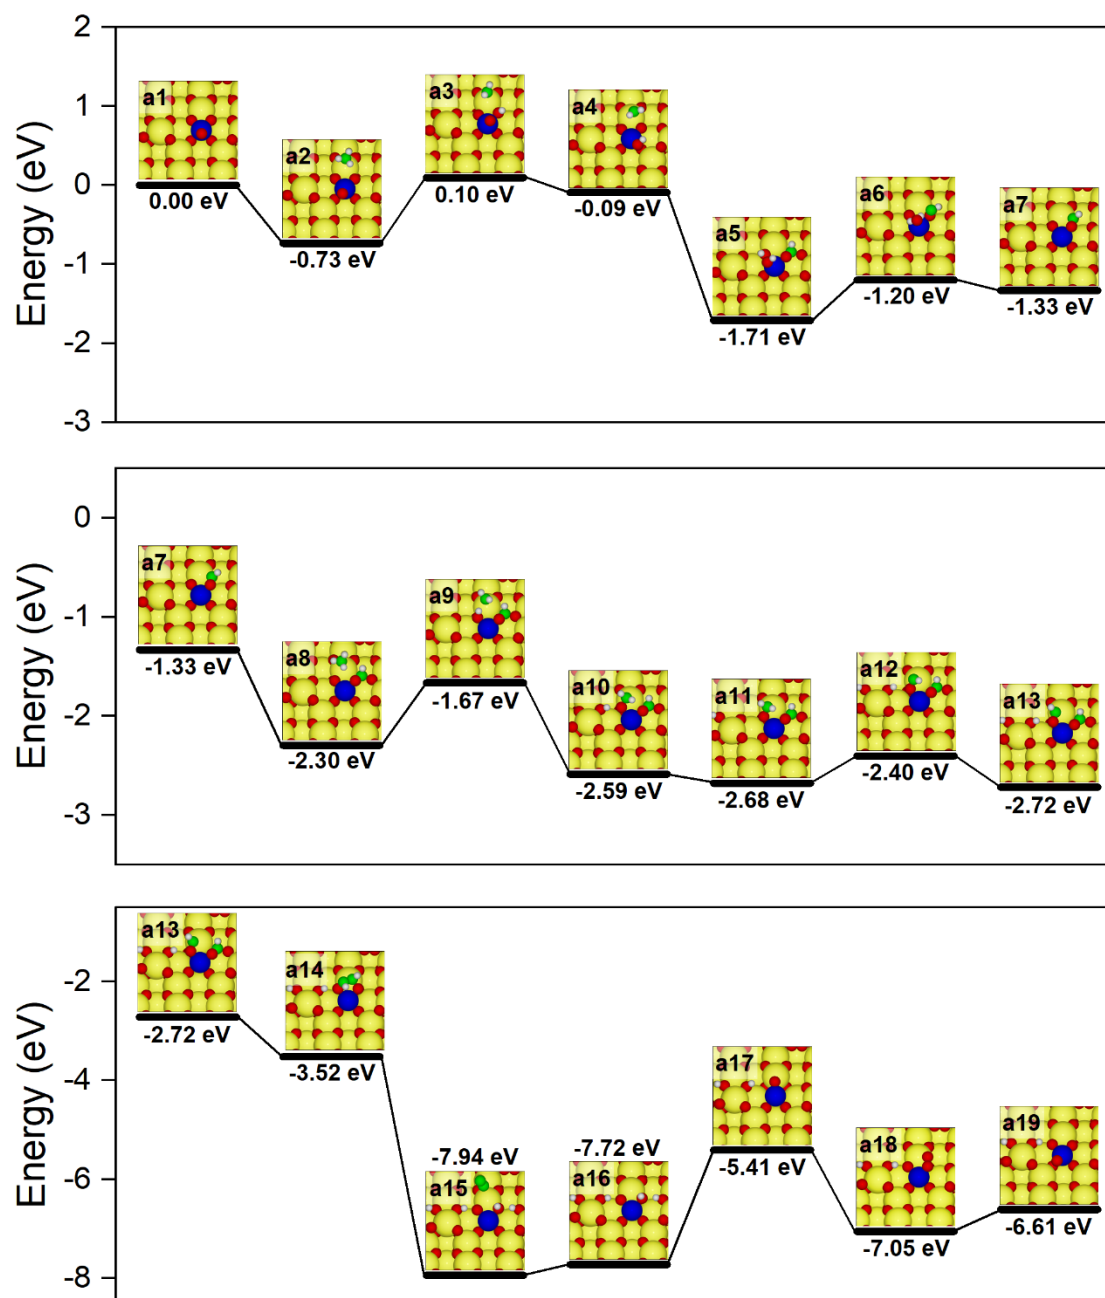

**Supplementary Fig. 31 NH<sub>3</sub> oxidation mechanism on Pt/CeO<sub>2</sub>-550.** Proposed mechanism for NH<sub>3</sub> oxidation on Pt@CeEdge-O structure (dominant configuration on Pt/CeO<sub>2</sub>-550). The potential energy was calculated with respect to NH<sub>3</sub> and O<sub>2</sub> in gas phase. Large yellow, medium blue, small red, green, and white balls represented Ce, Pt, O, N, and H atoms, respectively.

## Supplementary Information

233 **Notes:** The proposed mechanism for  $\text{NH}_3$  oxidation on Pt@CeEdge-O is shown in **Supplementary Fig.**  
234 **31.** The oxidation of  $\text{NH}_3$  on Pt@CeEdge-O started with the adsorption of  $\text{NH}_3$  on the surface Ce atom  
235 adjacent to the Pt atom with an adsorption energy of -0.73 eV (a2), followed by the dissociation of N-H  
236 bond to form  $\text{-NH}_2$  species and H atom that bound to an O atom adjacent to the Pt atom (a3). This process  
237 was endothermic with a reaction energy of 0.83 eV. Then, the H atom transferred to O atom on top of Pt  
238 to form -OH group (a4) with a reaction energy of -0.19 eV. The -NH species and H atom generated by the  
239 dissociation of another N-H bond could be coordinated to the O atoms adjacent to the Pt atom (a5). This  
240 process was exothermic with a reaction energy of -1.80 eV. Then, the H atom could combine with the -  
241 OH group adsorbed on top of Pt atom to form  $\text{H}_2\text{O}$  molecule (a6). This process was endothermic with a  
242 reaction energy of 0.51 eV. Subsequently, the formed  $\text{H}_2\text{O}$  molecule could desorb from the surface and at  
243 the same time the -NHO species reconfigured itself to bind on both Pt and surface Ce atom (a7) with a  
244 reaction energy of -0.13 eV. Then, the second  $\text{NH}_3$  was found to co-adsorb on the Ce atom (a8) with a  
245 reaction energy of -0.97 eV, followed by an endothermic N-H bond dissociation process with a reaction  
246 energy of 0.63 eV, resulting in the formation of  $\text{-NH}_2$  group and H atom that adsorbed on O atom (a9).  
247 The  $\text{-NH}_2$  group could then push the H atom to a nearby O atom to form  $\text{-NH}_2\text{O}$  group (a10), with a  
248 reaction energy of -0.92 eV. Interestingly, the H atom was found to prefer to move to the O atom far away  
249 from Pt atom (a11). Then, the N-H bond in  $\text{-NH}_2\text{O}$  could further dissociate to form configuration a12,  
250 with a reaction energy of 0.28 eV, which could then reconfigure itself into configuration a13 in which the  
251 N atoms of two -NH groups were coordinated to O atoms nearby the Pt atom. Moreover, these two -NH  
252 groups were found to prefer to combine together to form  $\text{N}_2\text{H}_2$  species (a14), with a reaction energy of -  
253 0.80 eV. From this configuration, once one N-H bond dissociated, the second N-H bond was found to  
254 dissociate spontaneously as well, thus generating a  $\text{N}_2$  molecule and two H atoms on the surface (a15).  
255 The reaction energy from a14 to a15 was -4.42 eV, indicating the high instability of  $\text{N}_2\text{H}_2$  species and the

## Supplementary Information

256 preference of N<sub>2</sub> formation. This N<sub>2</sub> molecule was found to desorb with a desorption energy of 0.22 eV  
257 (a16). Afterwards, the H atom and -OH group combined to form the second H<sub>2</sub>O molecule, which could  
258 desorb from the surface thus creating one oxygen vacancy (a17). It is noteworthy that the desorption of  
259 this H<sub>2</sub>O molecule was highly endothermic with a reaction energy of 2.31 eV, indicating that the formation  
260 and desorption of the second H<sub>2</sub>O molecule on Pt@CeEdge-O was the rate limiting step in this mechanism.  
261 The oxygen vacancy was then filled by the adsorption and dissociation of O<sub>2</sub> (a18 and a19). The adsorption  
262 of O<sub>2</sub> was an exothermic process (-1.64 eV) while the dissociation of O<sub>2</sub> was endothermic with a reaction  
263 energy of 0.44 eV.

## Supplementary Information

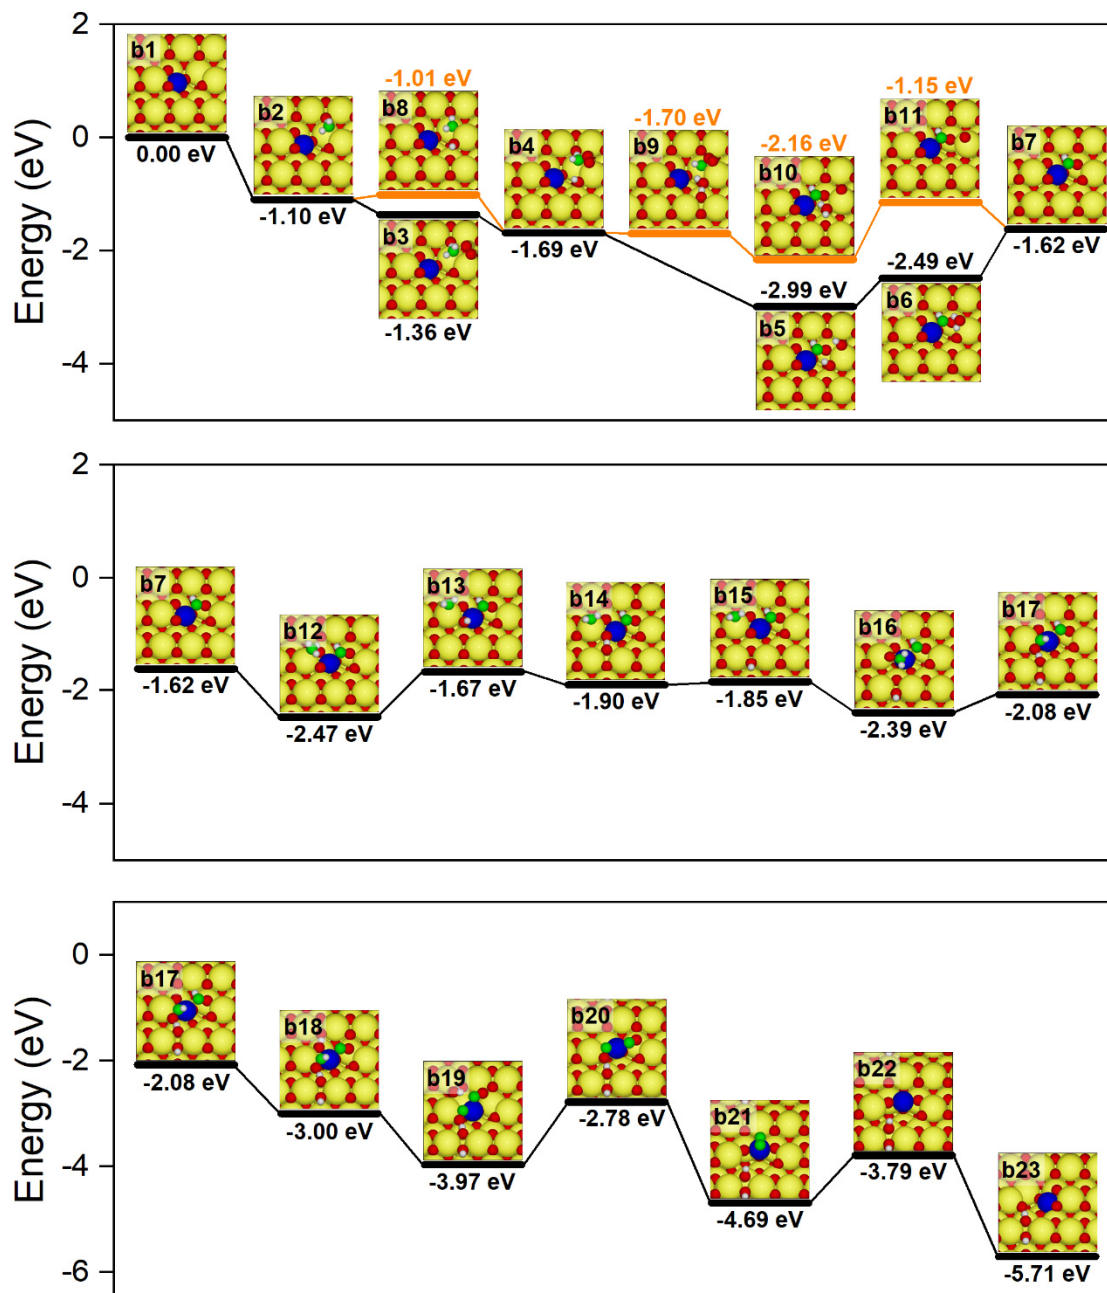

264

265

266

267

268

**Supplementary Fig. 32 NH<sub>3</sub> oxidation mechanism on Pt/CeO<sub>2</sub>-800.** Proposed mechanism for NH<sub>3</sub> oxidation on Pt@CeO<sub>v</sub><sup>(1)</sup> structure (dominant configuration on Pt/CeO<sub>2</sub>-800). The potential energy was calculated with respect to NH<sub>3</sub> and O<sub>2</sub> in gas phase. Large yellow, medium blue, small red, green, and white balls represented Ce, Pt, O, N, and H atoms, respectively.

## Supplementary Information

269 **Notes:** The proposed mechanism for  $\text{NH}_3$  oxidation on  $\text{Pt@CeO}_v^{(1)}$  is shown in **Supplementary Fig. 32**.  
270 After the adsorption of  $\text{NH}_3$  (b2,  $E_B = -1.10$  eV),  $\text{O}_2$  was adsorbed on the same Ce atom to form co-  
271 adsorption configuration with a binding energy of -1.36 eV (b3), followed by the dissociation of one N-H  
272 bond of  $\text{NH}_3$ . This formed H atom could combine with a surface O atom to form configuration b4. Then,  
273 the adsorbed  $\text{O}_2$  could dissociate and react with  $-\text{NH}_2$  species to form  $-\text{NHO}$  and  $-\text{OH}$  group (b5), with a  
274 reaction energy of -1.30 eV. Subsequently, the formed OH group combined with the H atom to form a  $\text{H}_2\text{O}$   
275 molecule (b6), which could then desorb from the surface (b7).

276 Besides, it was found that the  $-\text{NHO}$  species on the  $\text{Pt@CeO}_v^{(1)}$  structure could be formed through  
277 another pathway. In details, one N-H bond of the adsorbed  $\text{NH}_3$  molecule could dissociate to form  $-\text{NH}_2$   
278 and  $-\text{OH}$  group (b8), followed by the adsorption of  $\text{O}_2$  molecule (b4). Then, another N-H bond could  
279 dissociate (b9) and react with the dissociated  $\text{O}_2$  to form  $-\text{NH}$  groups and  $\text{H}_2\text{O}$  (b10).  $\text{H}_2\text{O}$  could then  
280 desorb from the surface, leaving an oxygen vacancy (b11). The oxygen vacancy could be filled by O atom  
281 from the dissociated  $\text{O}_2$  to form configuration b7.

282 Similar to what was observed on  $\text{Pt@CeEdge-O}$  structure, the second  $\text{NH}_3$  was found to adsorb at the  
283 Ce site nearby the Pt atom with a binding energy of -0.85 eV (b12), followed by a series of N-H bond  
284 dissociations and H atom diffusions to form adsorbed  $\text{H}_2\text{O}$  species and two  $-\text{NHO}$  groups (b12  $\rightarrow$  b17).  
285 The N-H bond of one  $-\text{NHO}$  group could further dissociate to form  $-\text{NO}$  and  $-\text{OH}$  group (b18), with a  
286 reaction energy of -0.92 eV. Then, the N-H bond of  $-\text{NHO}$  group could dissociate, and the resulting H  
287 atom could combine with the  $-\text{OH}$  group to form the second  $\text{H}_2\text{O}$  molecule (b19) with a reaction energy  
288 of -0.97 eV. The second  $\text{H}_2\text{O}$  molecule was found to desorb with a desorption energy of 1.19 eV, which  
289 was an endothermic process, leaving one oxygen vacancy on the surface (b20). The two N atoms from -  
290 NO groups could combine to form  $\text{N}_2$  adsorbed on the Pt atom (b21), and this process was exothermic  
291 with a reaction energy of -1.91 eV. The desorption of  $\text{N}_2$  (b21  $\rightarrow$  b22) was an endothermic process with a

## Supplementary Information

292 reaction energy of 0.90 eV. After N<sub>2</sub> desorption, a Pt-O<sub>3</sub> structure was formed (Pt@CeO<sub>v</sub><sup>(2)</sup>), which could  
293 then reconstruct into Pt@CeO<sub>v</sub><sup>(1)</sup> configuration. In this proposed reaction pathway, the endothermic  
294 process for second H<sub>2</sub>O desorption (b19 → b20) was the rate limiting step.

## Supplementary Information

### References

1. Wu Z. *et al.* Probing the surface sites of CeO<sub>2</sub> nanocrystals with well-defined surface planes via methanol adsorption and desorption. *ACS Catal.* **2**, 2224-2234 (2012).
2. Loridant S. Raman spectroscopy as a powerful tool to characterize ceria-based catalysts. *Catal. Today* **373**, 98-111 (2021).
3. Brogan MS. *et al.* Raman spectroscopic study of the Pt-CeO<sub>2</sub> interaction in the Pt/Al<sub>2</sub>O<sub>3</sub>-CeO<sub>2</sub> catalyst. *J. Chem. Soc., Faraday trans.* **90**, 1461-1466 (1994).
4. Thang HV. *et al.* Nature of stable single atom Pt catalysts dispersed on anatase TiO<sub>2</sub>. *J. Catal.* **367**, 104-114 (2018).
5. R.F.W. Bader. *Atoms in Molecules: A Quantum Theory*. Oxford University Press, New York; 1994.
6. W. Tang, E. Sanville, and G. Henkelman. A grid-based Bader analysis algorithm without lattice bias. *J. Phys. Condens. Matter* **21**, 084204 (2009).
7. Quinson J. *et al.* Investigating particle size effects in catalysis by applying a size-controlled and surfactant-free synthesis of colloidal nanoparticles in alkaline ethylene glycol: Case study of the oxygen reduction reaction on Pt. *ACS Catal.* **8**, 6627-6635 (2018).
